# Supplementary material for: First-Trimester Screening for Miscarriage or Stillbirth—Prediction Model Based on MicroRNA Biomarkers
Source: MDPI journal article supplement (doi:10.3390/ijms241210137), 2023-06-14
Supplement: s1 [file s1]

Supplementary Figure S2.

A

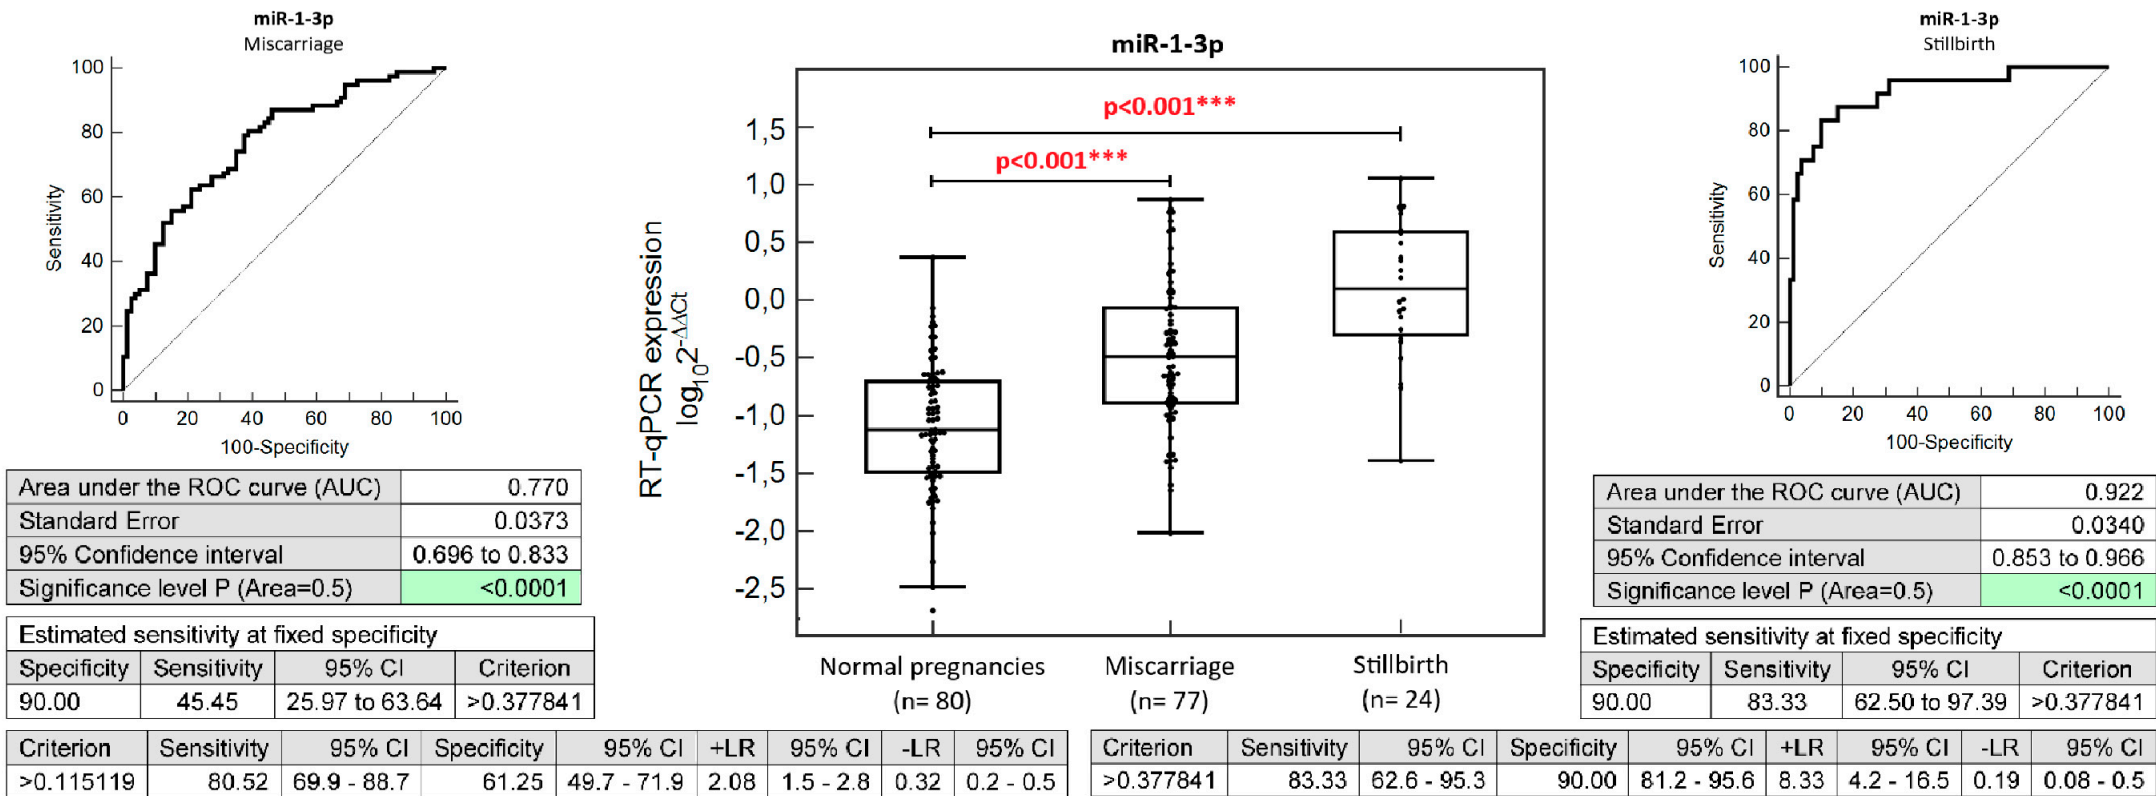

B

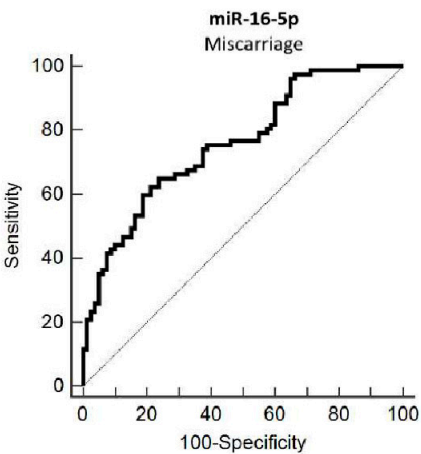

|                                 |                |
|---------------------------------|----------------|
| Area under the ROC curve (AUC)  | 0.757          |
| Standard Error                  | 0.0378         |
| 95% Confidence interval         | 0.683 to 0.822 |
| Significance level P (Area=0.5) | <0.0001        |

| Estimated sensitivity at fixed specificity |             |                |           |
|--------------------------------------------|-------------|----------------|-----------|
| Specificity                                | Sensitivity | 95% CI         | Criterion |
| 90.00                                      | 44.16       | 28.57 to 59.74 | >3.02212  |

| Criterion | Sensitivity | 95% CI      | Specificity | 95% CI      | +LR  | 95% CI    | -LR  | 95% CI    |
|-----------|-------------|-------------|-------------|-------------|------|-----------|------|-----------|
| >1.983489 | 64.94       | 53.2 - 75.5 | 76.25       | 65.4 - 85.1 | 2.73 | 1.8 - 4.2 | 0.46 | 0.3 - 0.6 |

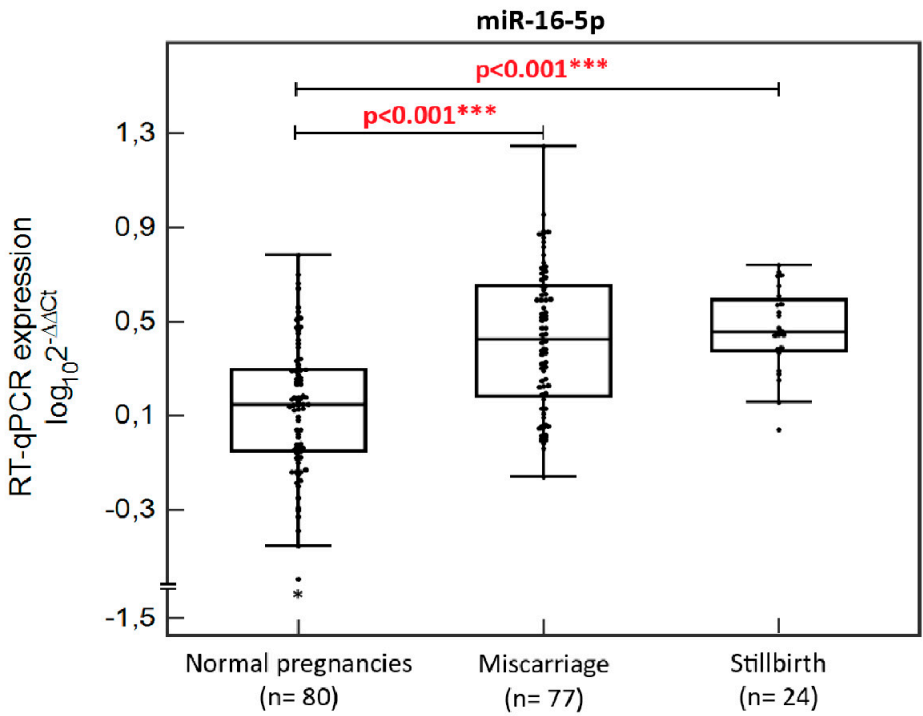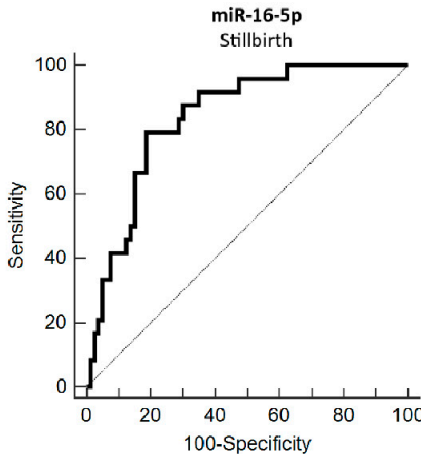

|                                 |                |
|---------------------------------|----------------|
| Area under the ROC curve (AUC)  | 0.839          |
| Standard Error                  | 0.0415         |
| 95% Confidence interval         | 0.754 to 0.903 |
| Significance level P (Area=0.5) | <0.0001        |

| Estimated sensitivity at fixed specificity |             |                |           |
|--------------------------------------------|-------------|----------------|-----------|
| Specificity                                | Sensitivity | 95% CI         | Criterion |
| 90.00                                      | 41.67       | 16.67 to 75.00 | >3.02212  |

| Criterion | Sensitivity | 95% CI      | Specificity | 95% CI      | +LR  | 95% CI    | -LR  | 95% CI    |
|-----------|-------------|-------------|-------------|-------------|------|-----------|------|-----------|
| >2.212571 | 79.17       | 57.8 - 92.9 | 81.25       | 71.0 - 89.1 | 4.22 | 2.6 - 7.0 | 0.26 | 0.1 - 0.6 |

C

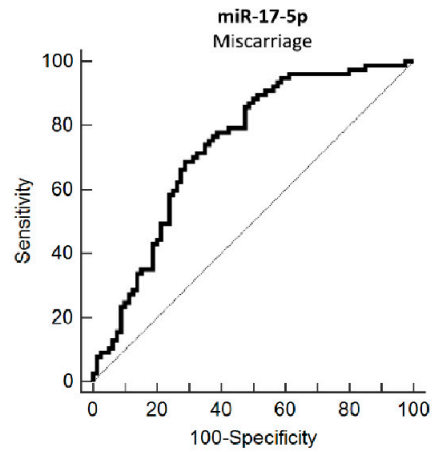

|                                 |                |
|---------------------------------|----------------|
| Area under the ROC curve (AUC)  | 0.736          |
| Standard Error                  | 0.0403         |
| 95% Confidence interval         | 0.660 to 0.803 |
| Significance level P (Area=0.5) | <0.0001        |

| Estimated sensitivity at fixed specificity |             |               |           |
|--------------------------------------------|-------------|---------------|-----------|
| Specificity                                | Sensitivity | 95% CI        | Criterion |
| 90.00                                      | 24.68       | 6.49 to 41.56 | >3.458809 |

| Criterion | Sensitivity | 95% CI      | Specificity | 95% CI      | +LR  | 95% CI    | -LR  | 95% CI    |
|-----------|-------------|-------------|-------------|-------------|------|-----------|------|-----------|
| >1.780378 | 68.83       | 57.3 - 78.9 | 71.25       | 60.0 - 80.8 | 2.39 | 1.6 - 3.5 | 0.44 | 0.3 - 0.6 |

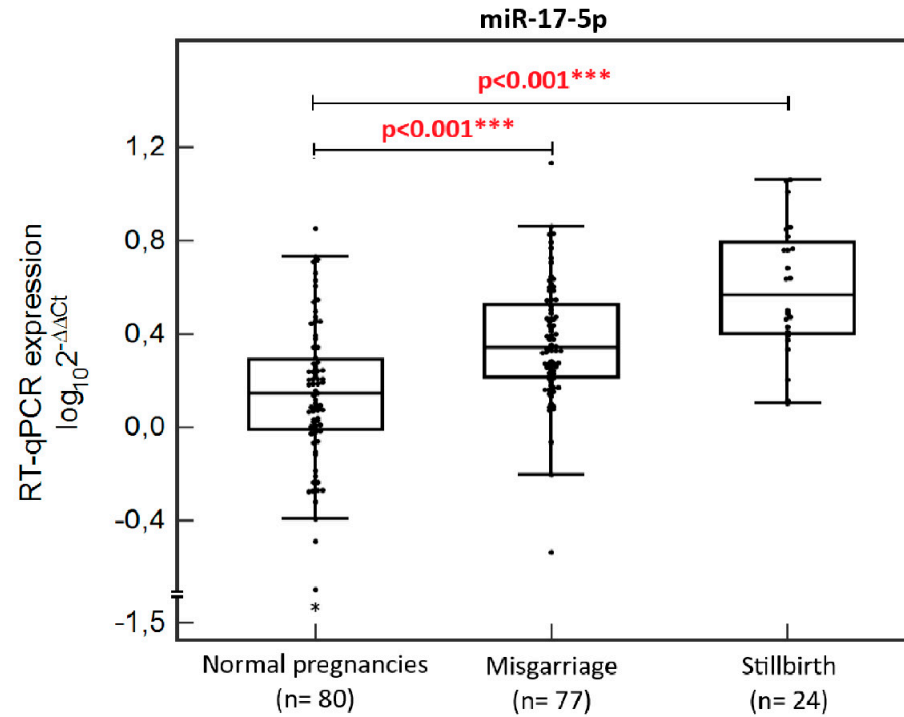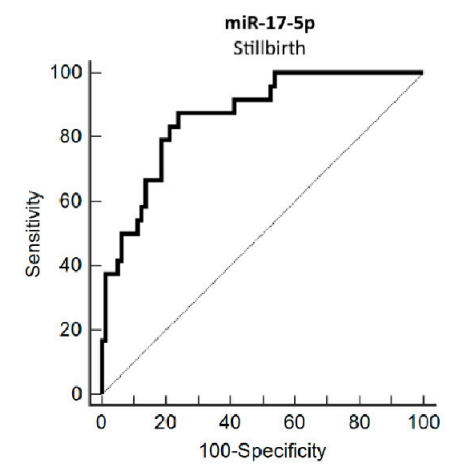

|                                 |                |
|---------------------------------|----------------|
| Area under the ROC curve (AUC)  | 0.865          |
| Standard Error                  | 0.0391         |
| 95% Confidence interval         | 0.784 to 0.924 |
| Significance level P (Area=0.5) | <0.0001        |

| Estimated sensitivity at fixed specificity |             |                |           |
|--------------------------------------------|-------------|----------------|-----------|
| Specificity                                | Sensitivity | 95% CI         | Criterion |
| 90.00                                      | 50.00       | 20.83 to 70.83 | >3.458809 |

| Criterion | Sensitivity | 95% CI      | Specificity | 95% CI      | +LR  | 95% CI    | -LR  | 95% CI     |
|-----------|-------------|-------------|-------------|-------------|------|-----------|------|------------|
| >1.978627 | 87.50       | 67.6 - 97.3 | 76.25       | 65.4 - 85.1 | 3.68 | 2.4 - 5.6 | 0.16 | 0.06 - 0.5 |

D

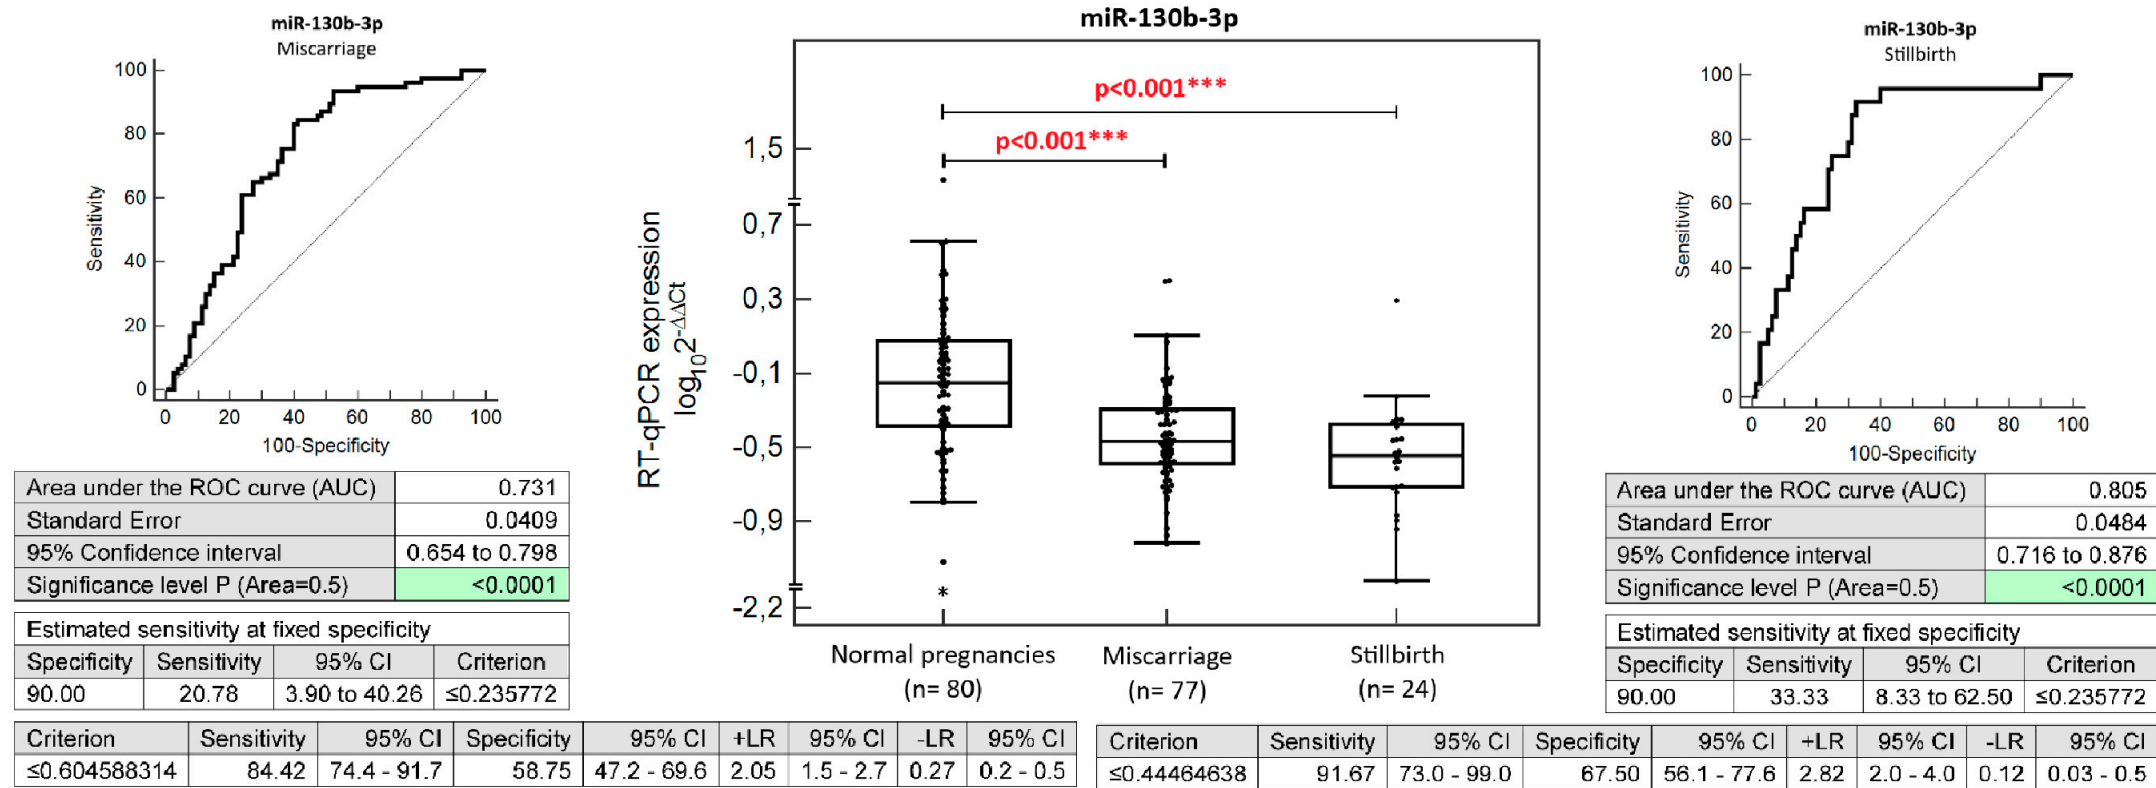

E

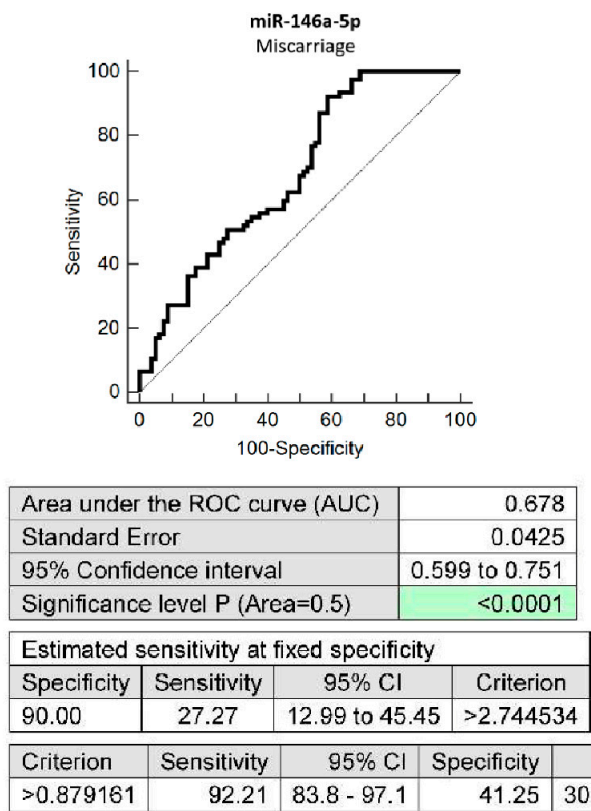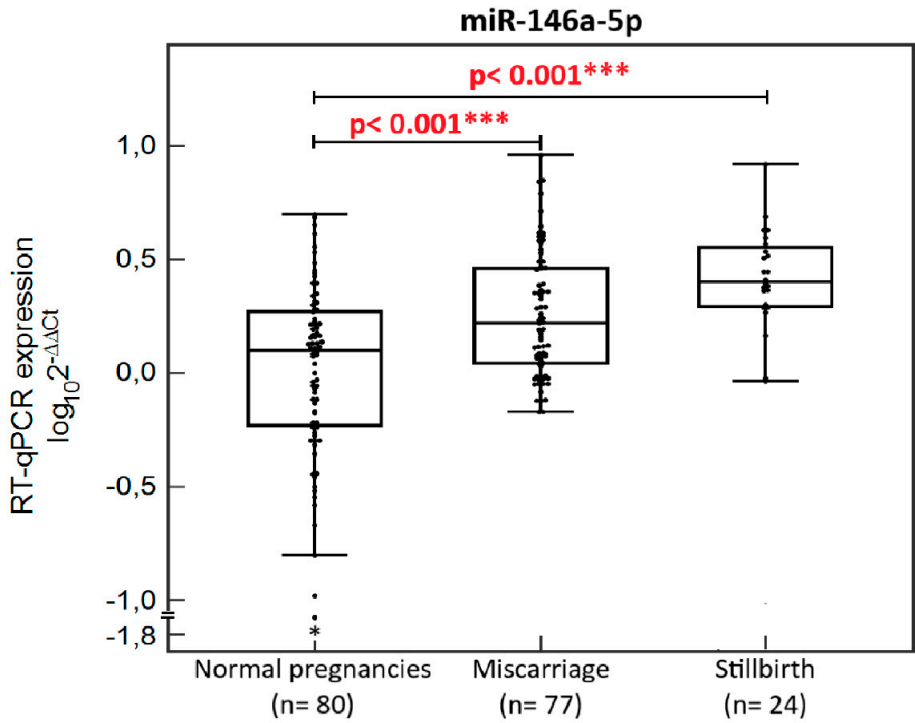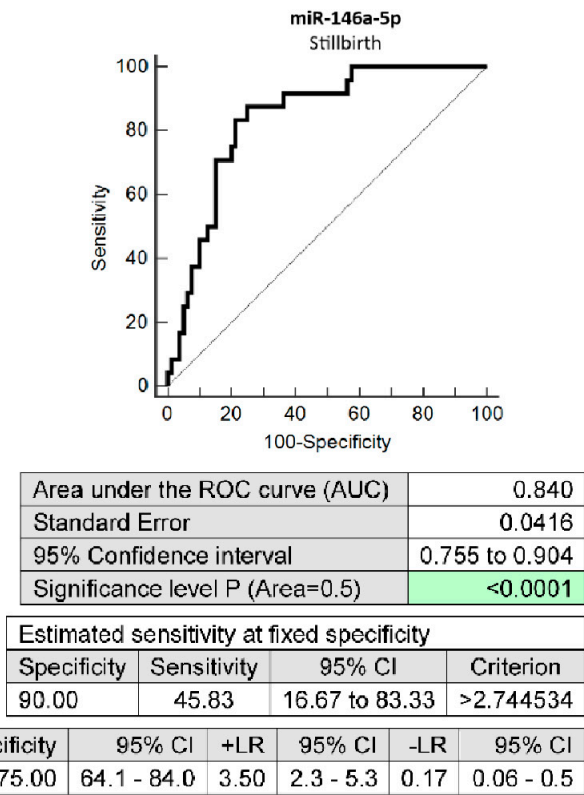

F

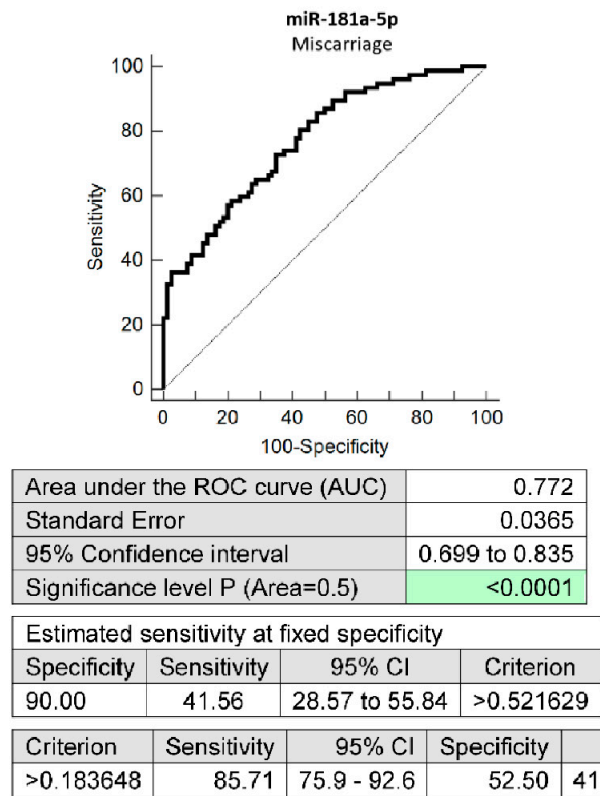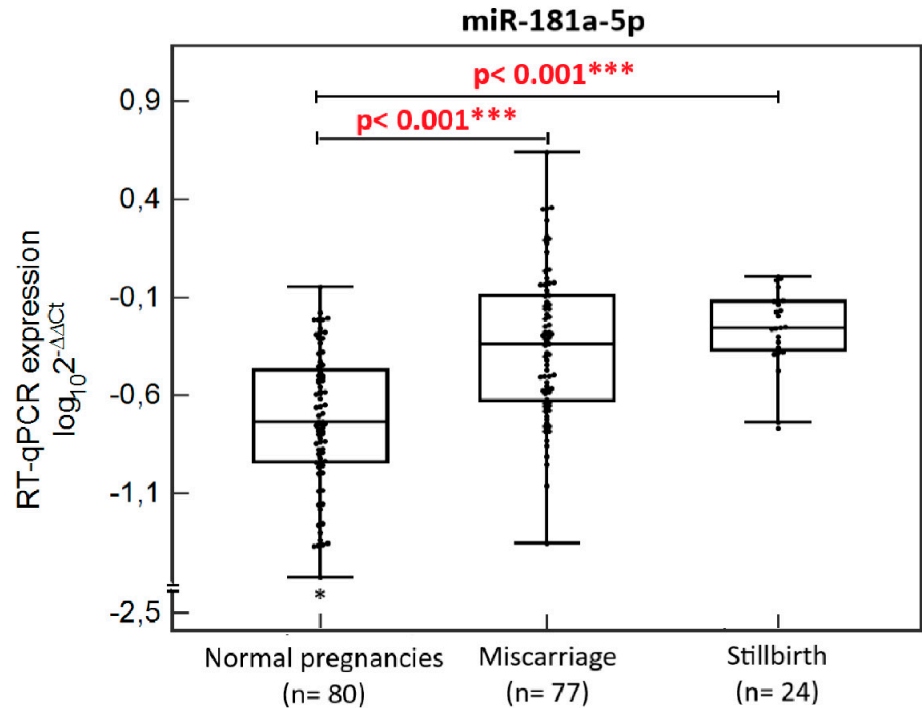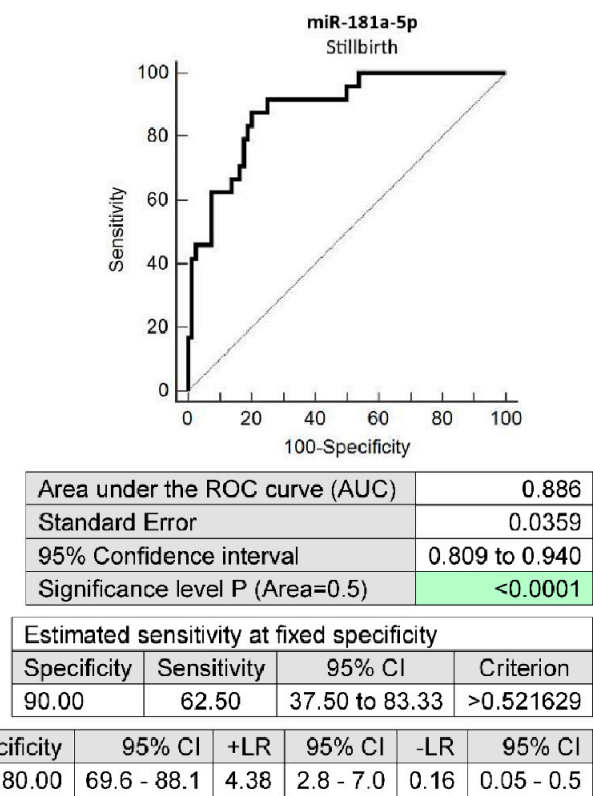

G

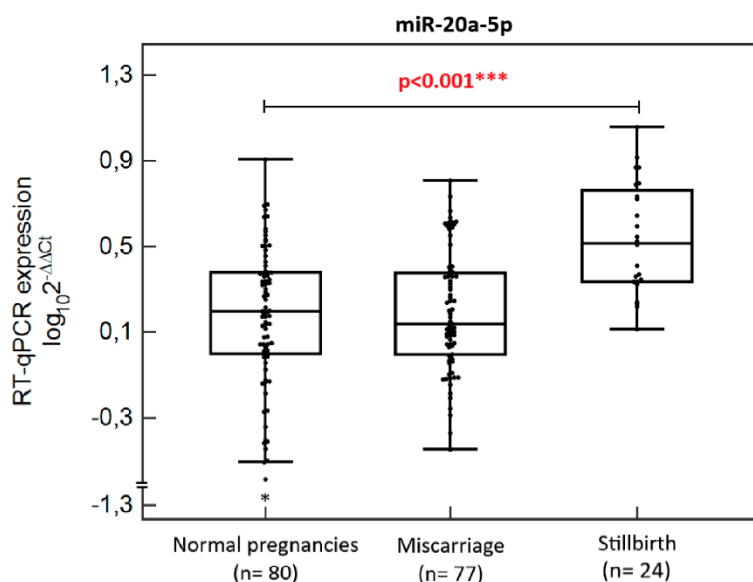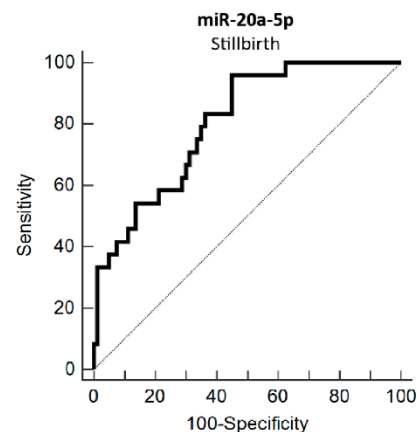

|                                 |                |
|---------------------------------|----------------|
| Area under the ROC curve (AUC)  | 0.803          |
| Standard Error                  | 0.0467         |
| 95% Confidence interval         | 0.714 to 0.875 |
| Significance level P (Area=0.5) | <0.0001        |

| Estimated sensitivity at fixed specificity |             |                |           |
|--------------------------------------------|-------------|----------------|-----------|
| Specificity                                | Sensitivity | 95% CI         | Criterion |
| 90.00                                      | 41.67       | 20.83 to 62.50 | >3.587078 |

| Criterion | Sensitivity | 95% CI      | Specificity | 95% CI      | +LR  | 95% CI    | -LR   | 95% CI     |
|-----------|-------------|-------------|-------------|-------------|------|-----------|-------|------------|
| >1.6574   | 95.83       | 78.9 - 99.9 | 55.00       | 43.5 - 66.2 | 2.13 | 1.6 - 2.8 | 0.076 | 0.01 - 0.5 |

H

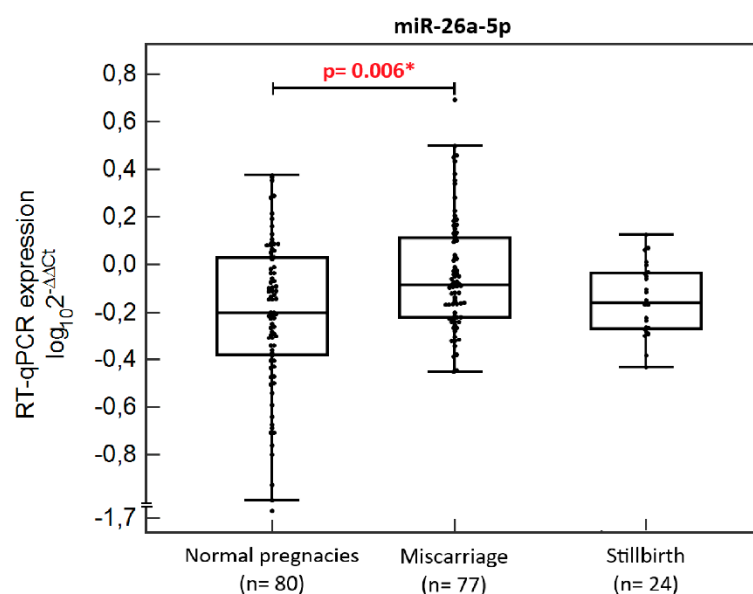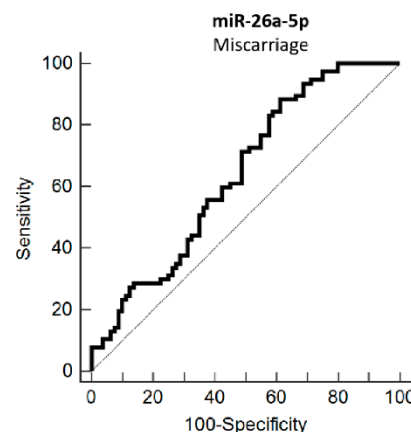

|                                 |                |
|---------------------------------|----------------|
| Area under the ROC curve (AUC)  | 0.640          |
| Standard Error                  | 0.0441         |
| 95% Confidence interval         | 0.560 to 0.715 |
| Significance level P (Area=0.5) | 0.0015         |

| Estimated sensitivity at fixed specificity |             |               |           |
|--------------------------------------------|-------------|---------------|-----------|
| Specificity                                | Sensitivity | 95% CI        | Criterion |
| 90.00                                      | 23.38       | 9.09 to 37.66 | >1.350228 |

| Criterion | Sensitivity | 95% CI      | Specificity | 95% CI      | +LR  | 95% CI    | -LR  | 95% CI    |
|-----------|-------------|-------------|-------------|-------------|------|-----------|------|-----------|
| >0.525138 | 88.31       | 79.0 - 94.5 | 38.75       | 28.1 - 50.3 | 1.44 | 1.2 - 1.7 | 0.30 | 0.2 - 0.6 |



I

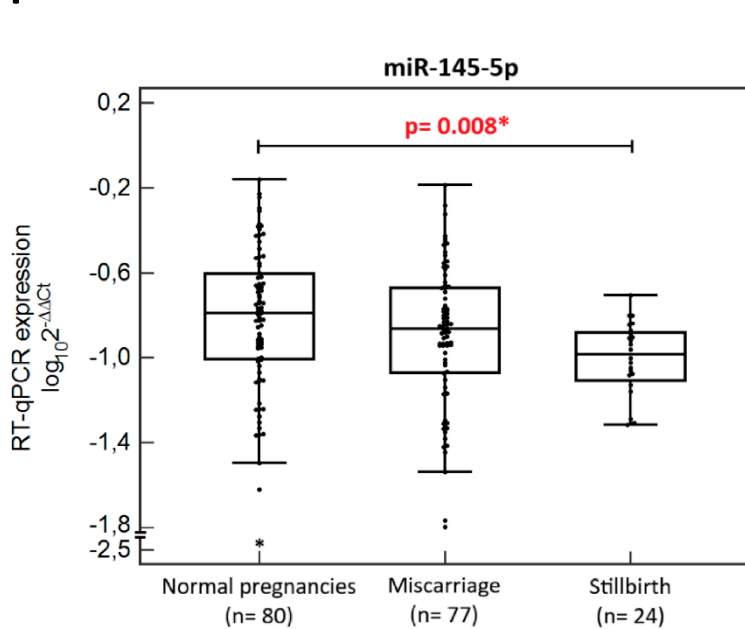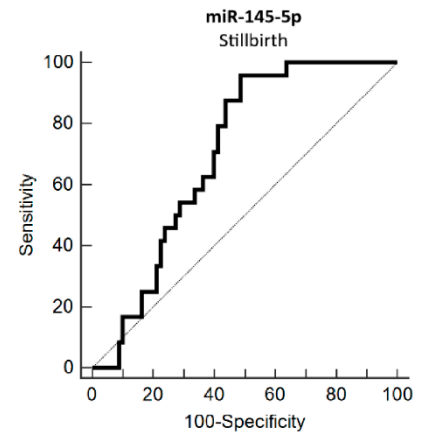

|                                 |                |
|---------------------------------|----------------|
| Area under the ROC curve (AUC)  | 0.701          |
| Standard Error                  | 0.0504         |
| 95% Confidence interval         | 0.603 to 0.786 |
| Significance level P (Area=0.5) | 0.0001         |

| Estimated sensitivity at fixed specificity |             |               |                    |
|--------------------------------------------|-------------|---------------|--------------------|
| Specificity                                | Sensitivity | 95% CI        | Criterion          |
| 90.00                                      | 16.67       | 0.00 to 41.67 | $\leq 0.051862838$ |

| Criterion         | Sensitivity | 95% CI      | Specificity | 95% CI      | +LR  | 95% CI    | -LR   | 95% CI     |
|-------------------|-------------|-------------|-------------|-------------|------|-----------|-------|------------|
| $\leq 0.15890505$ | 95.83       | 78.9 - 99.9 | 51.25       | 39.8 - 62.6 | 1.97 | 1.5 - 2.5 | 0.081 | 0.01 - 0.6 |

J

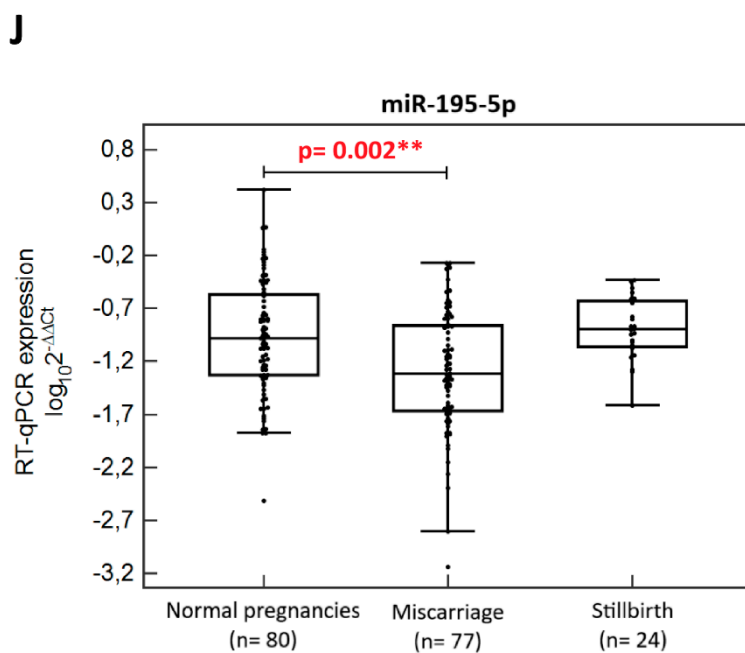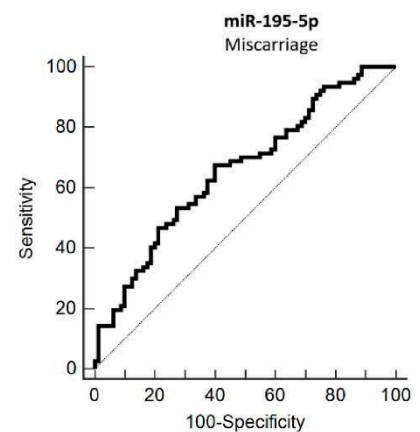

|                                 |                |
|---------------------------------|----------------|
| Area under the ROC curve (AUC)  | 0.657          |
| Standard Error                  | 0.0434         |
| 95% Confidence interval         | 0.577 to 0.731 |
| Significance level P (Area=0.5) | 0.0003         |

| Estimated sensitivity at fixed specificity |             |                |                    |
|--------------------------------------------|-------------|----------------|--------------------|
| Specificity                                | Sensitivity | 95% CI         | Criterion          |
| 90.00                                      | 27.27       | 12.99 to 45.63 | $\leq 0.022487627$ |

| Criterion          | Sensitivity | 95% CI      | Specificity | 95% CI      | +LR  | 95% CI    | -LR  | 95% CI    |
|--------------------|-------------|-------------|-------------|-------------|------|-----------|------|-----------|
| $\leq 0.082537076$ | 67.53       | 55.9 - 77.8 | 60.00       | 48.4 - 70.8 | 1.69 | 1.2 - 2.3 | 0.54 | 0.4 - 0.8 |



K

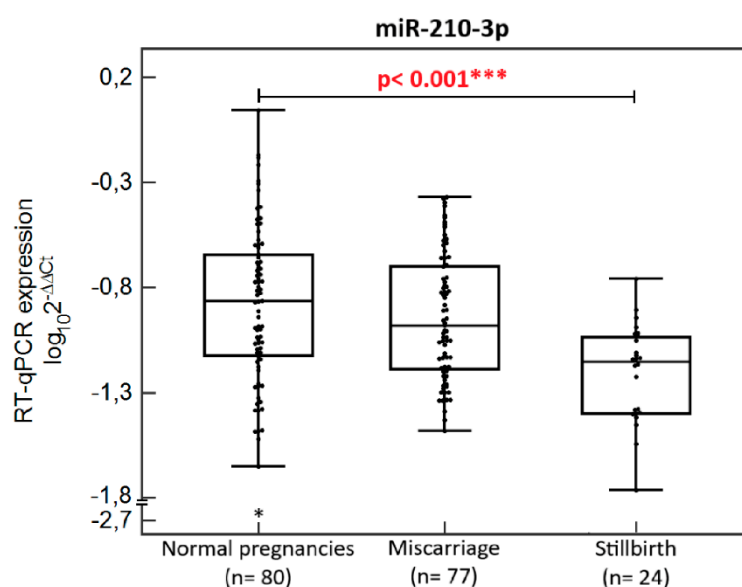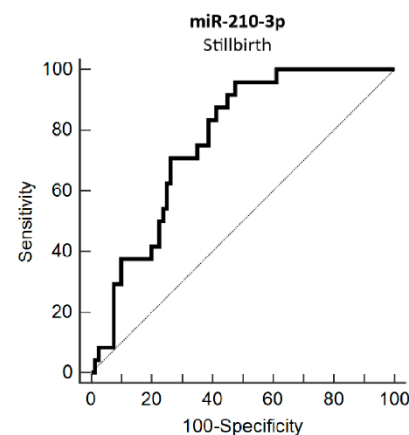

|                                 |                |
|---------------------------------|----------------|
| Area under the ROC curve (AUC)  | 0.767          |
| Standard Error                  | 0.0472         |
| 95% Confidence interval         | 0.674 to 0.844 |
| Significance level P (Area=0.5) | <0.0001        |

| Estimated sensitivity at fixed specificity |             |                |            |
|--------------------------------------------|-------------|----------------|------------|
| Specificity                                | Sensitivity | 95% CI         | Criterion  |
| 90.00                                      | 37.50       | 12.50 to 66.67 | ≤0.0418995 |

| Criterion    | Sensitivity | 95% CI      | Specificity | 95% CI      | +LR  | 95% CI    | -LR   | 95% CI     |
|--------------|-------------|-------------|-------------|-------------|------|-----------|-------|------------|
| ≤0.124362787 | 95.83       | 78.9 - 99.9 | 52.50       | 41.0 - 63.8 | 2.02 | 1.6 - 2.6 | 0.079 | 0.01 - 0.5 |

L

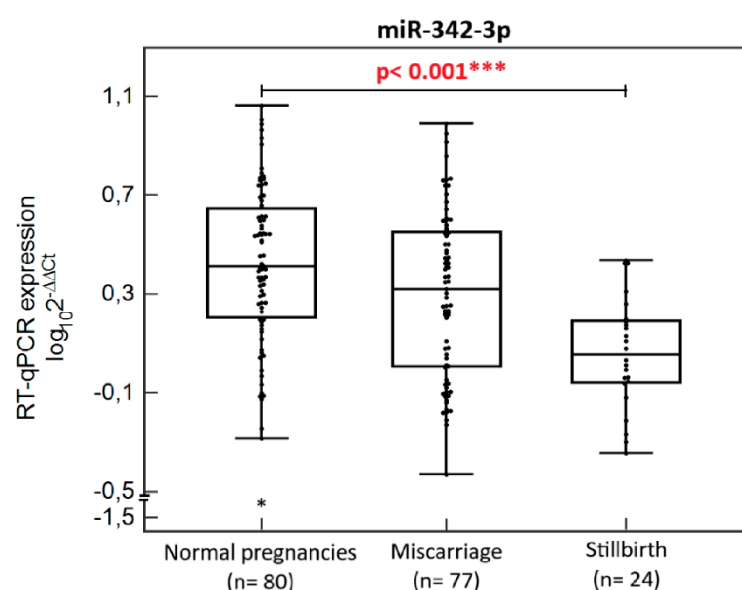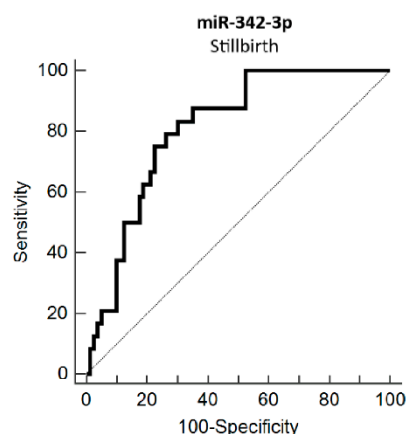

|                                 |                |
|---------------------------------|----------------|
| Area under the ROC curve (AUC)  | 0.808          |
| Standard Error                  | 0.0441         |
| 95% Confidence interval         | 0.719 to 0.879 |
| Significance level P (Area=0.5) | <0.0001        |

| Estimated sensitivity at fixed specificity |             |                |              |
|--------------------------------------------|-------------|----------------|--------------|
| Specificity                                | Sensitivity | 95% CI         | Criterion    |
| 90.00                                      | 37.50       | 12.50 to 75.00 | ≤0.909153316 |

| Criterion   | Sensitivity | 95% CI      | Specificity | 95% CI      | +LR  | 95% CI    | -LR  | 95% CI     |
|-------------|-------------|-------------|-------------|-------------|------|-----------|------|------------|
| ≤1.81094546 | 83.33       | 62.6 - 95.3 | 70.00       | 58.7 - 79.7 | 2.78 | 1.9 - 4.1 | 0.24 | 0.10 - 0.6 |

M

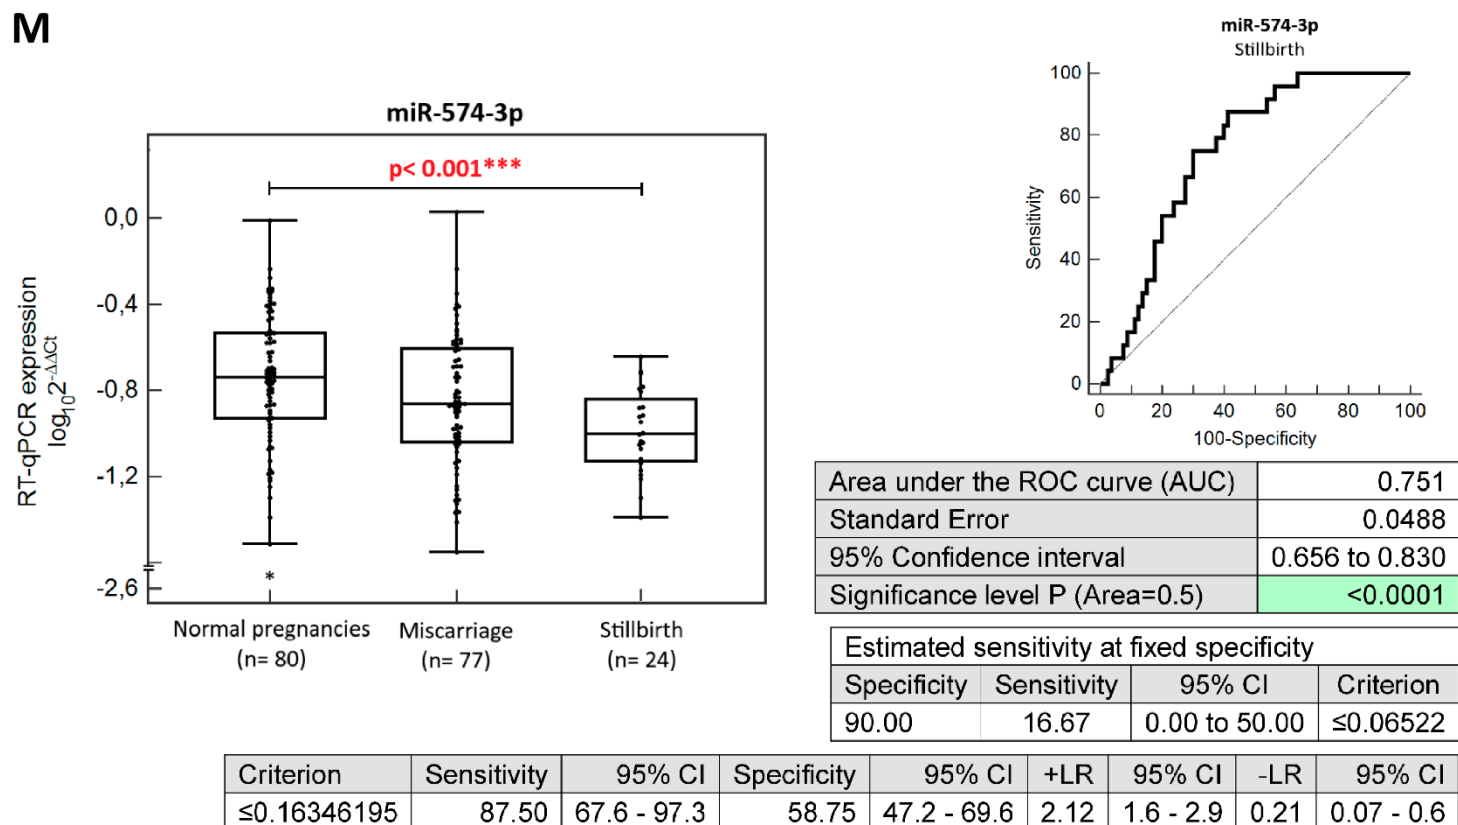

**Supplementary Figure S2.** Comparison of miRNAs gene expression in peripheral blood leukocytes in early stages of gestation between pregnancies with normal course and those with subsequent miscarriage or stillbirth. Significant dysregulation (after the Benjamini-Hochberg correction) of miR-1-3p (A), miR-16-5p (B), miR-17-5p (C), miR-130b-3p (D), miR-146a-5p (E), and miR-181a-5p (F) in both groups, pregnancies with subsequent miscarriage or stillbirth; significant dysregulation (after the Benjamini-Hochberg correction) of miR-20a-5p (G), miR-145-5p (I), miR-210-3p (K), miR-342-3p (L), and miR-574-3p (M) in the group of pregnancies with subsequent stillbirth and miR-26a-5p (H) and miR-195-5p (J) in the group of pregnancies with subsequent miscarriage only.

(results after the Benjamini-Hochberg correction are marked by \* for  $\alpha=0.05$ , \*\* for  $\alpha=0.01$ , and \*\*\* for  $\alpha=0.001$ )
