# Supplementary material for: First-Trimester Screening for Miscarriage or Stillbirth—Prediction Model Based on MicroRNA Biomarkers
Source: MDPI journal article supplement (doi:10.3390/ijms241210137), 2023-06-14
Supplement: s1 [file s1]

Supplementary Figure S3.

A

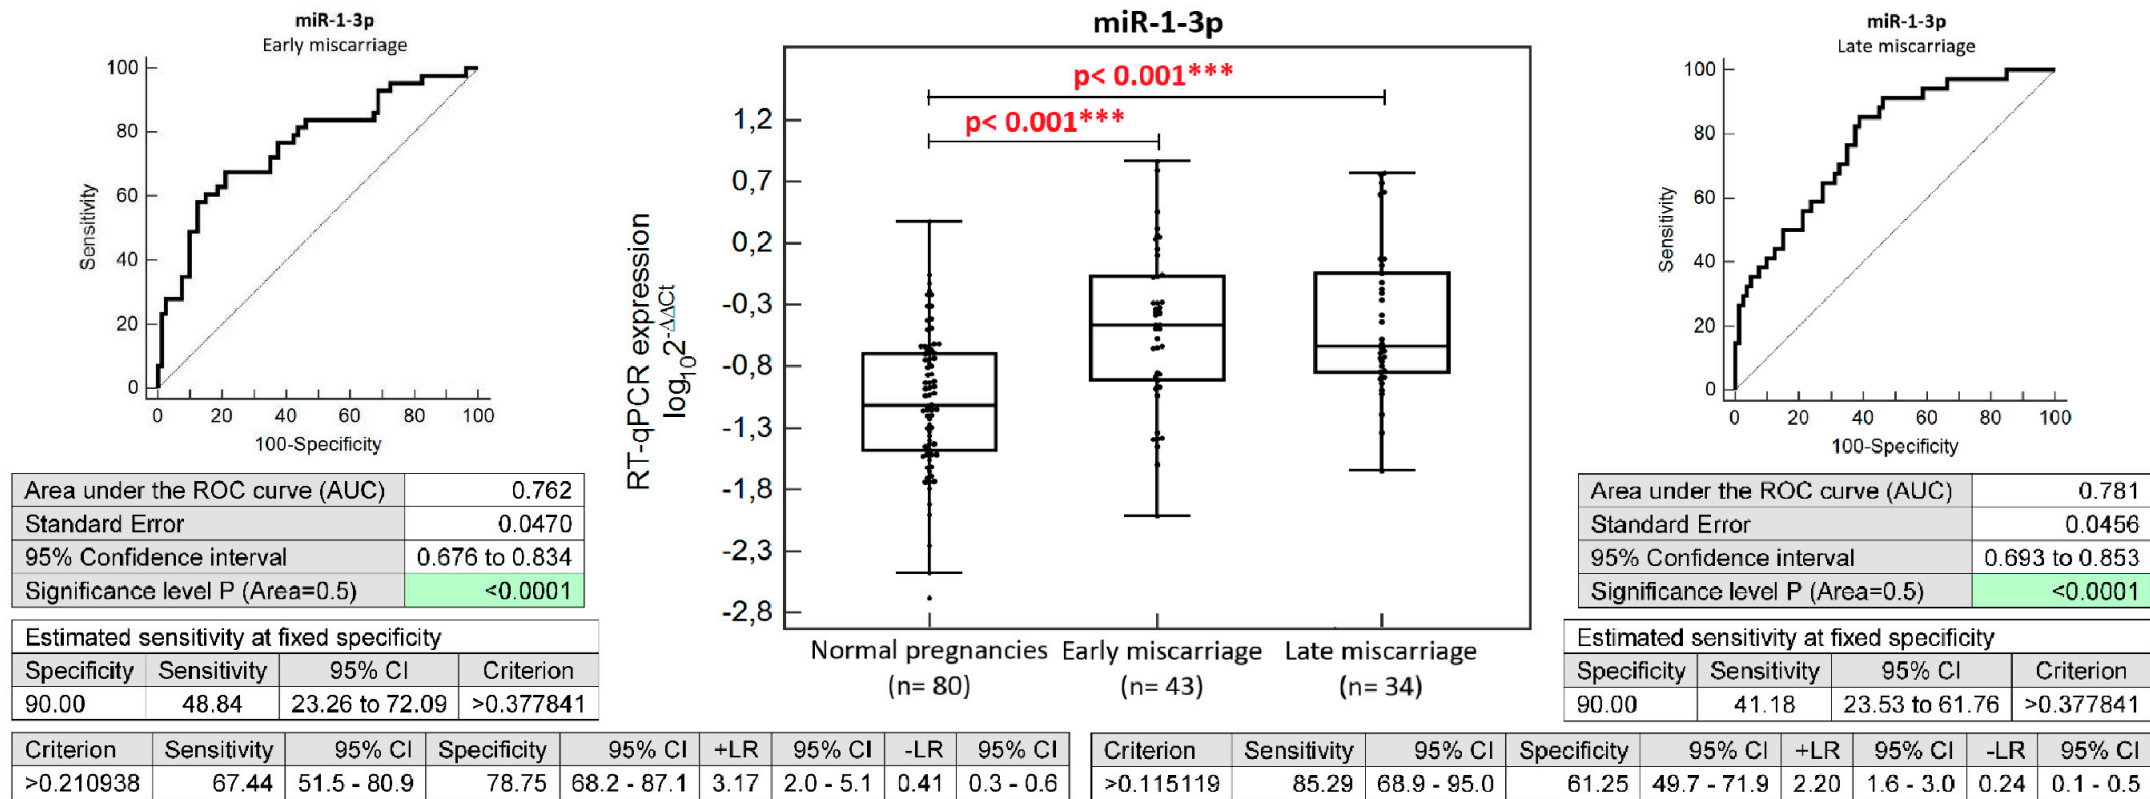

**B**

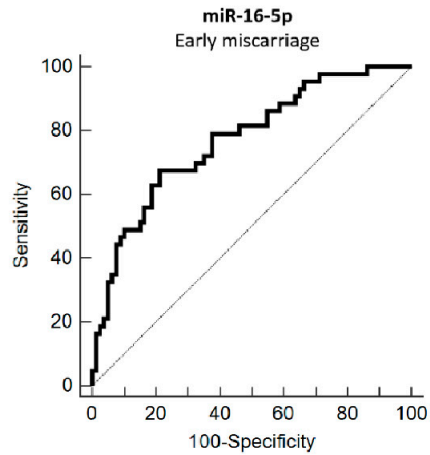

|                                 |                |
|---------------------------------|----------------|
| Area under the ROC curve (AUC)  | 0.771          |
| Standard Error                  | 0.0445         |
| 95% Confidence interval         | 0.686 to 0.842 |
| Significance level P (Area=0.5) | <0.0001        |

| Estimated sensitivity at fixed specificity |             |                |           |
|--------------------------------------------|-------------|----------------|-----------|
| Specificity                                | Sensitivity | 95% CI         | Criterion |
| 90.00                                      | 48.84       | 27.91 to 69.77 | >3.02212  |

| Criterion | Sensitivity | 95% CI      | Specificity | 95% CI      | +LR  | 95% CI    | -LR  | 95% CI    |
|-----------|-------------|-------------|-------------|-------------|------|-----------|------|-----------|
| >2.085522 | 67.44       | 51.5 - 80.9 | 78.75       | 68.2 - 87.1 | 3.17 | 2.0 - 5.1 | 0.41 | 0.3 - 0.6 |

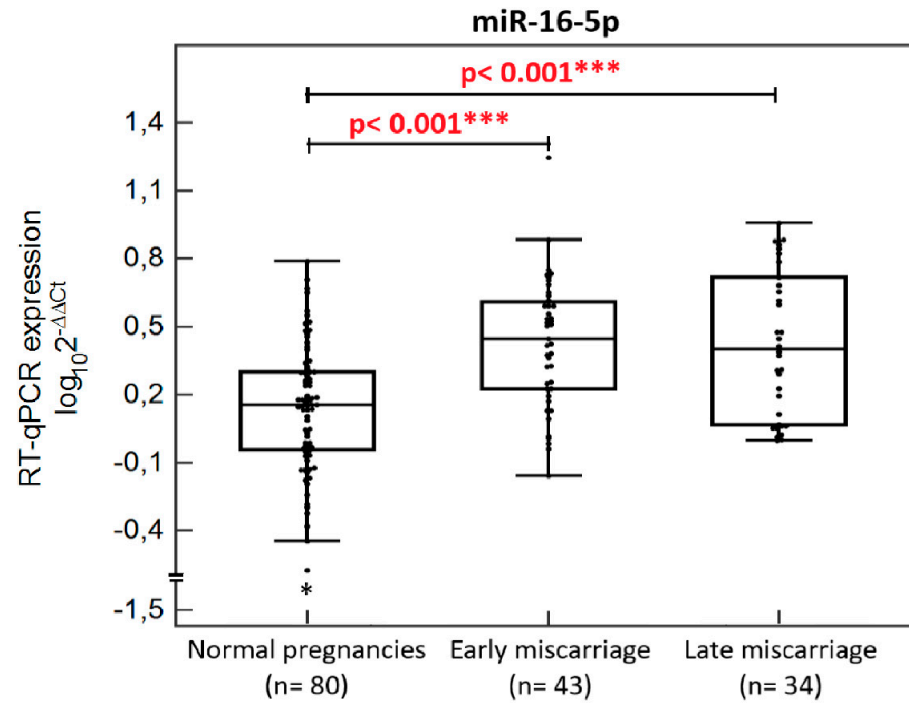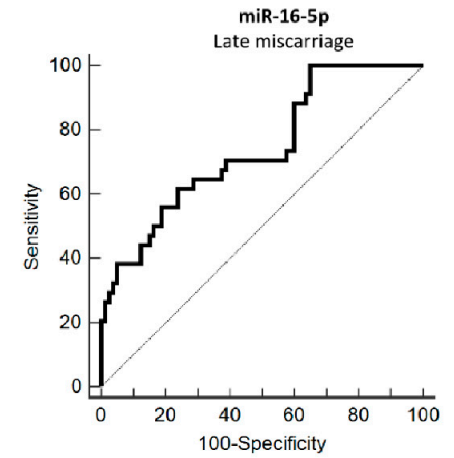

|                                 |                |
|---------------------------------|----------------|
| Area under the ROC curve (AUC)  | 0.741          |
| Standard Error                  | 0.0510         |
| 95% Confidence interval         | 0.650 to 0.818 |
| Significance level P (Area=0.5) | <0.0001        |

| Estimated sensitivity at fixed specificity |             |                |           |
|--------------------------------------------|-------------|----------------|-----------|
| Specificity                                | Sensitivity | 95% CI         | Criterion |
| 90.00                                      | 38.24       | 20.59 to 55.88 | >3.02212  |

| Criterion | Sensitivity | 95% CI      | Specificity | 95% CI      | +LR  | 95% CI    | -LR  | 95% CI    |
|-----------|-------------|-------------|-------------|-------------|------|-----------|------|-----------|
| >1.983489 | 61.76       | 43.6 - 77.8 | 76.25       | 65.4 - 85.1 | 2.60 | 1.6 - 4.2 | 0.50 | 0.3 - 0.8 |

C

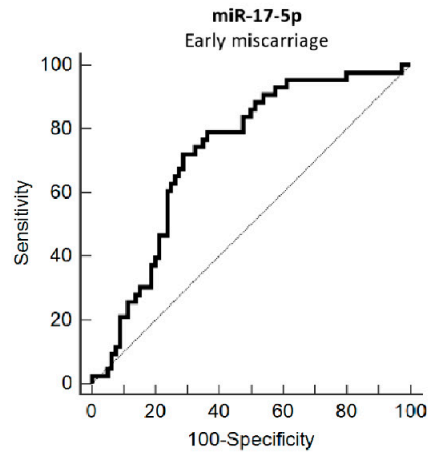

|                                 |                |
|---------------------------------|----------------|
| Area under the ROC curve (AUC)  | 0.726          |
| Standard Error                  | 0.0466         |
| 95% Confidence interval         | 0.638 to 0.802 |
| Significance level P (Area=0.5) | <0.0001        |

| Estimated sensitivity at fixed specificity |             |               |           |
|--------------------------------------------|-------------|---------------|-----------|
| Specificity                                | Sensitivity | 95% CI        | Criterion |
| 90.00                                      | 20.93       | 2.33 to 41.86 | >3.458809 |

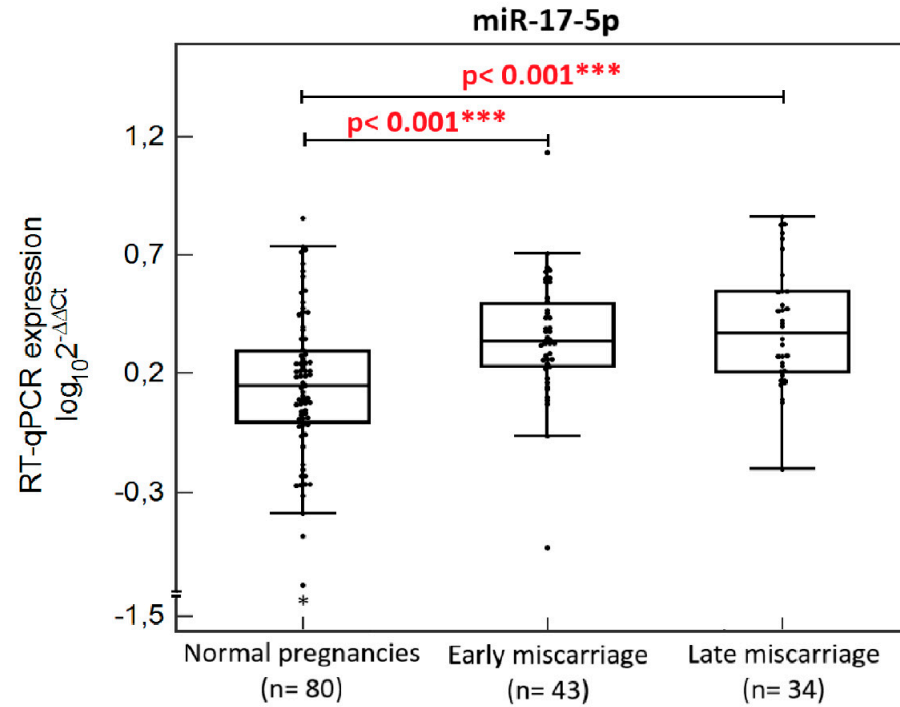

| Criterion | Sensitivity | 95% CI      | Specificity | 95% CI      | +LR  | 95% CI    | -LR  | 95% CI    |
|-----------|-------------|-------------|-------------|-------------|------|-----------|------|-----------|
| >1.780378 | 72.09       | 56.3 - 84.7 | 71.25       | 60.0 - 80.8 | 2.51 | 1.7 - 3.7 | 0.39 | 0.2 - 0.6 |

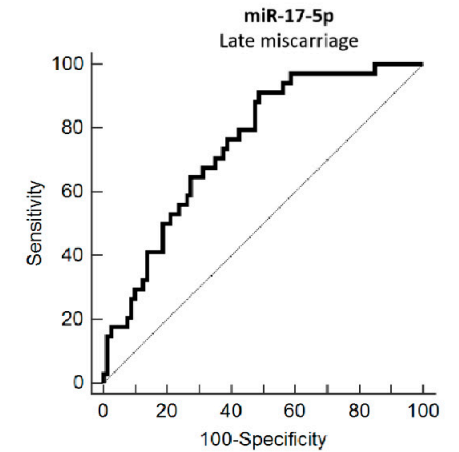

|                                 |                |
|---------------------------------|----------------|
| Area under the ROC curve (AUC)  | 0.749          |
| Standard Error                  | 0.0469         |
| 95% Confidence interval         | 0.659 to 0.825 |
| Significance level P (Area=0.5) | <0.0001        |

| Estimated sensitivity at fixed specificity |             |               |           |
|--------------------------------------------|-------------|---------------|-----------|
| Specificity                                | Sensitivity | 95% CI        | Criterion |
| 90.00                                      | 29.41       | 8.82 to 52.94 | >3.458809 |

| Criterion | Sensitivity | 95% CI      | Specificity | 95% CI      | +LR  | 95% CI    | -LR  | 95% CI     |
|-----------|-------------|-------------|-------------|-------------|------|-----------|------|------------|
| >1.396173 | 91.18       | 76.3 - 98.1 | 51.25       | 39.8 - 62.6 | 1.87 | 1.5 - 2.4 | 0.17 | 0.06 - 0.5 |

D

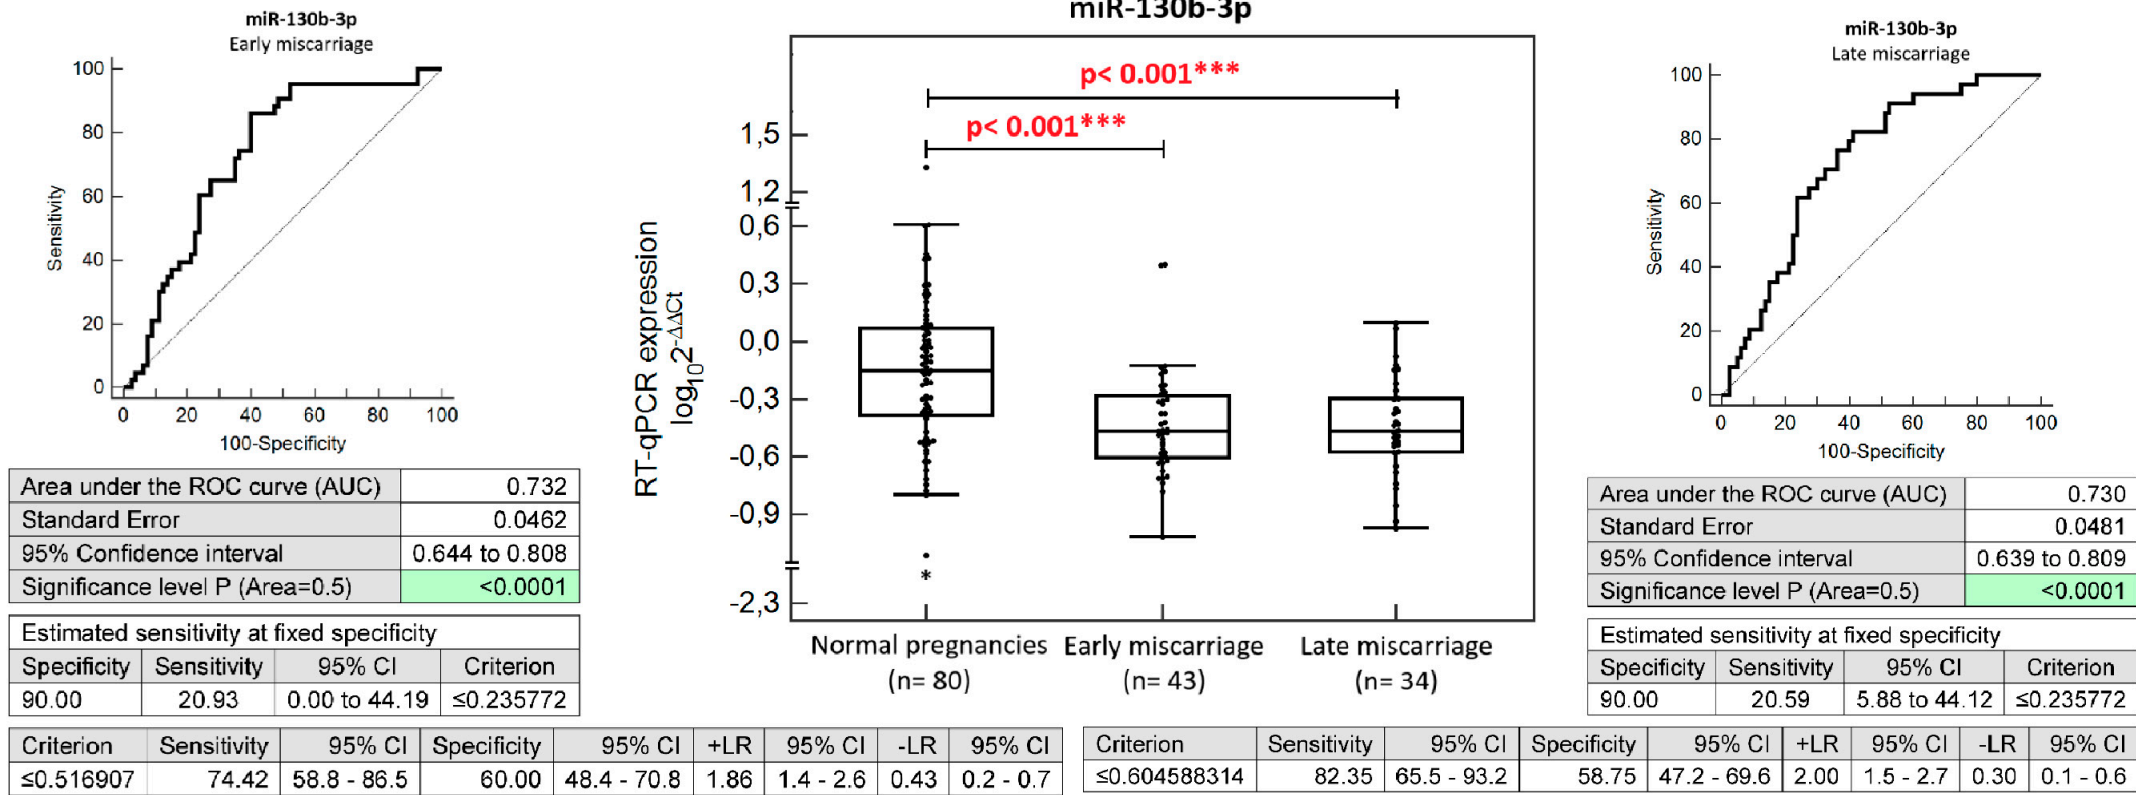

E

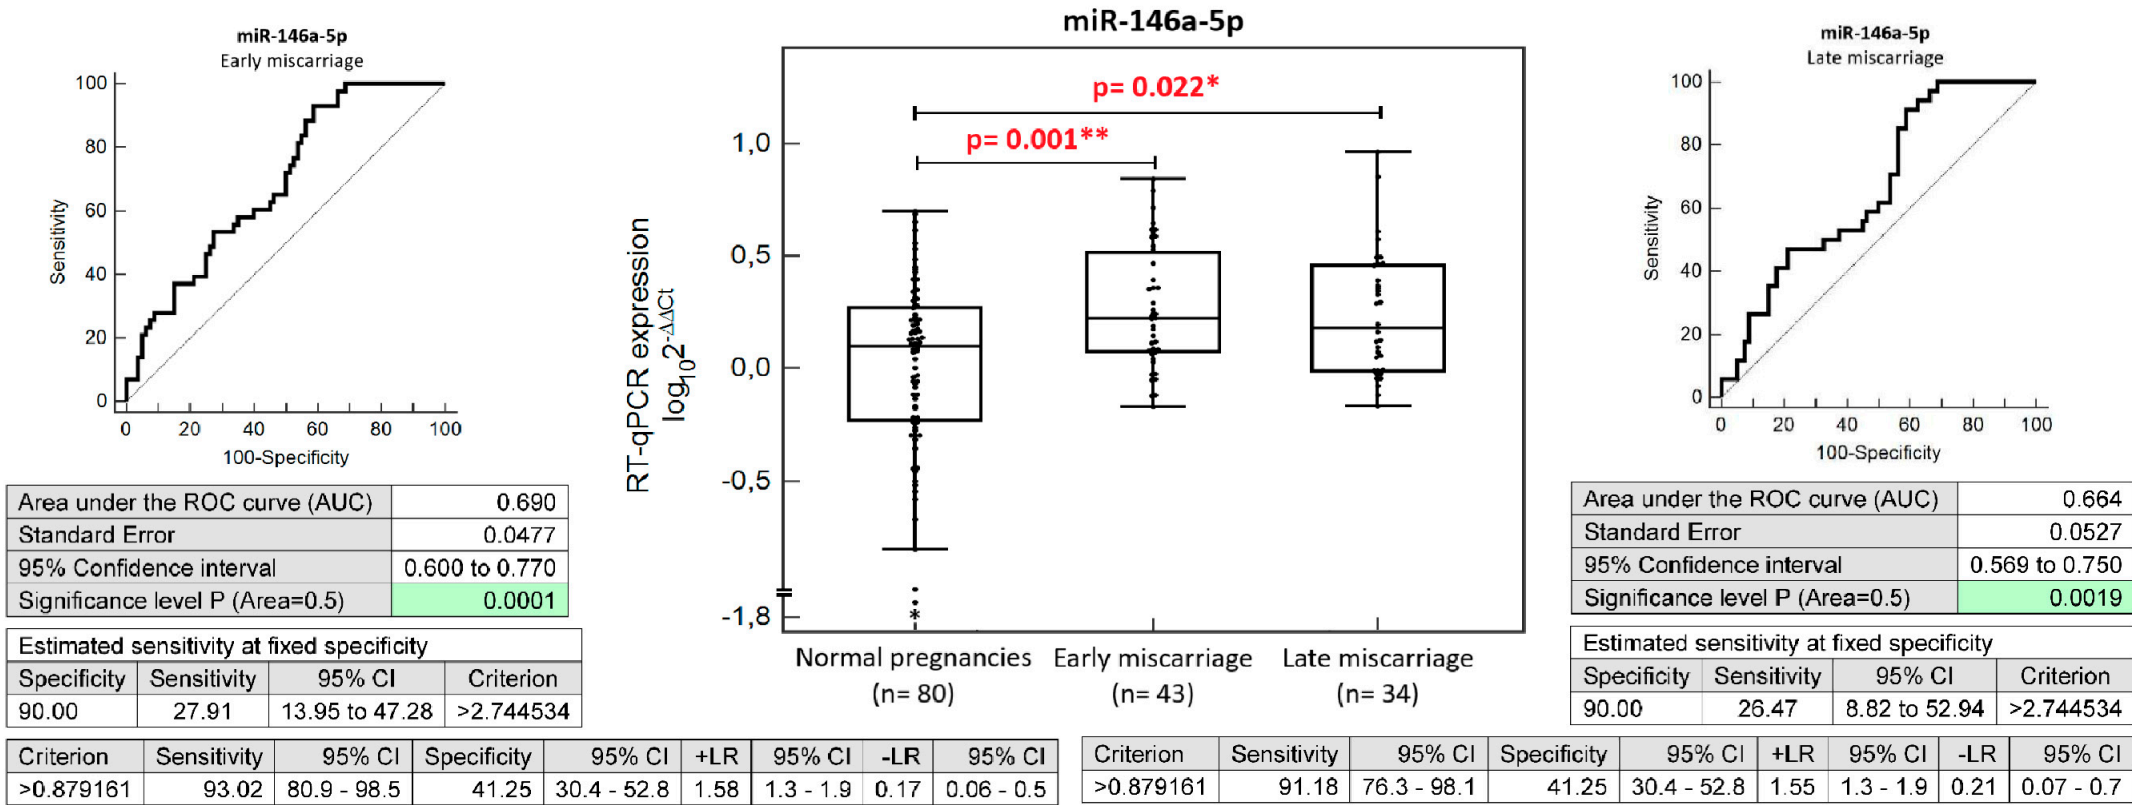

F

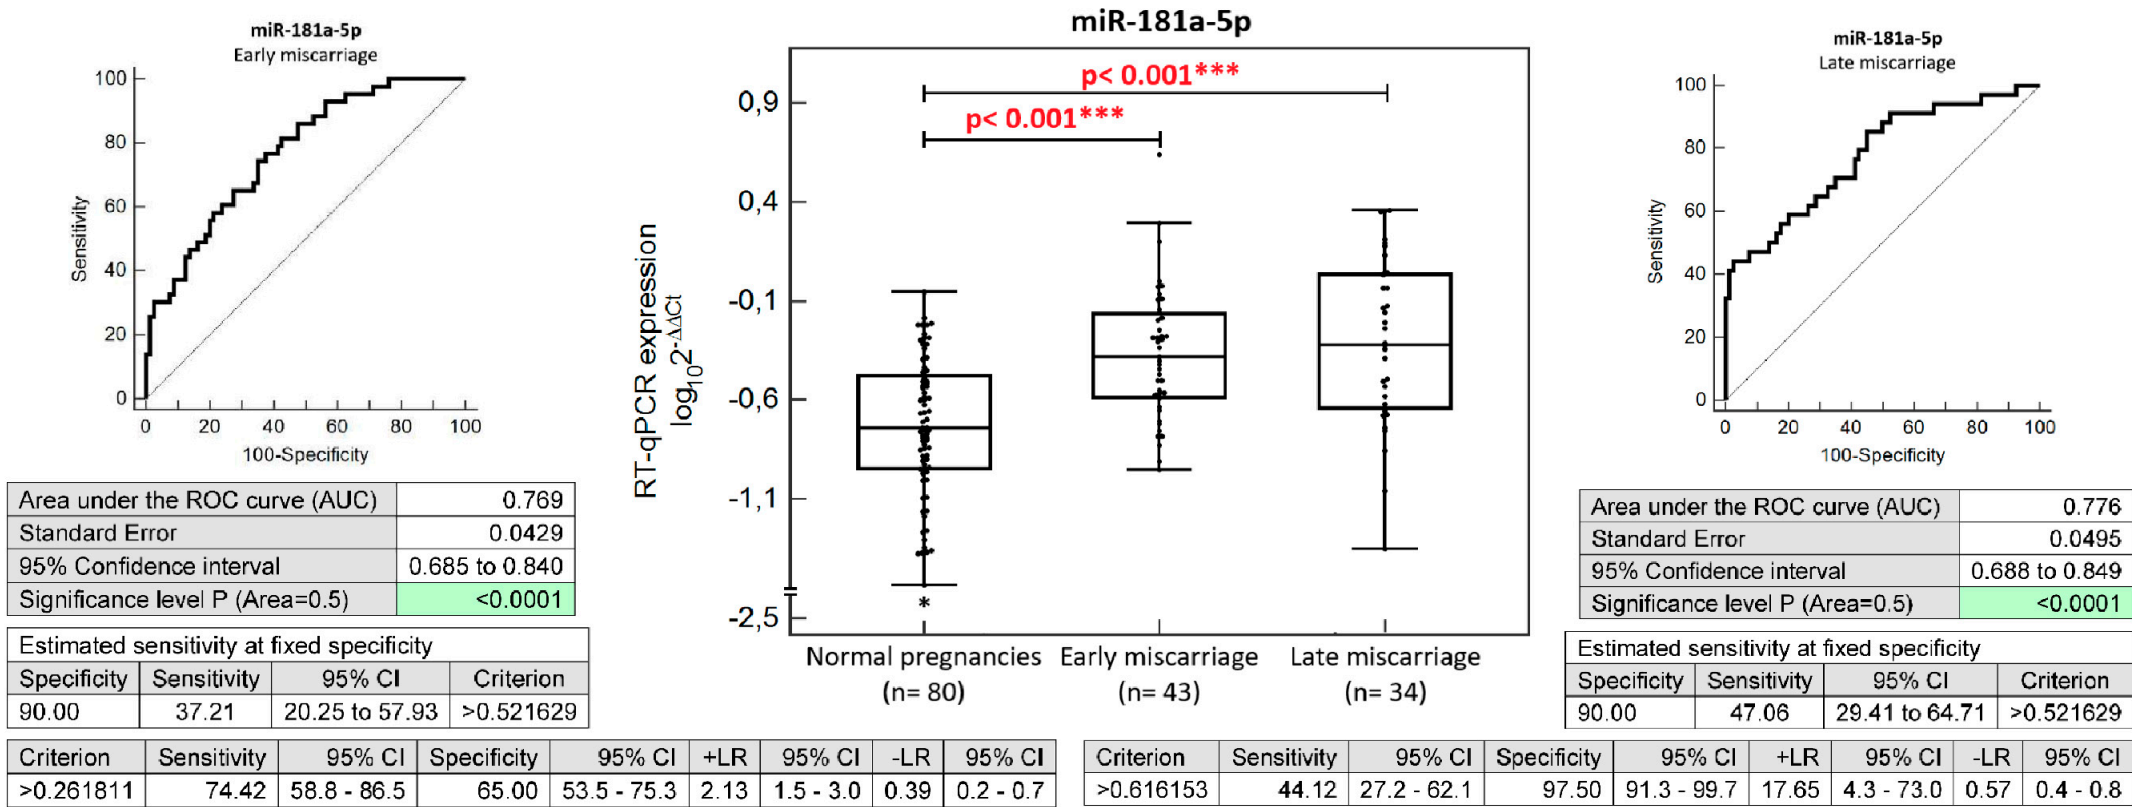

G

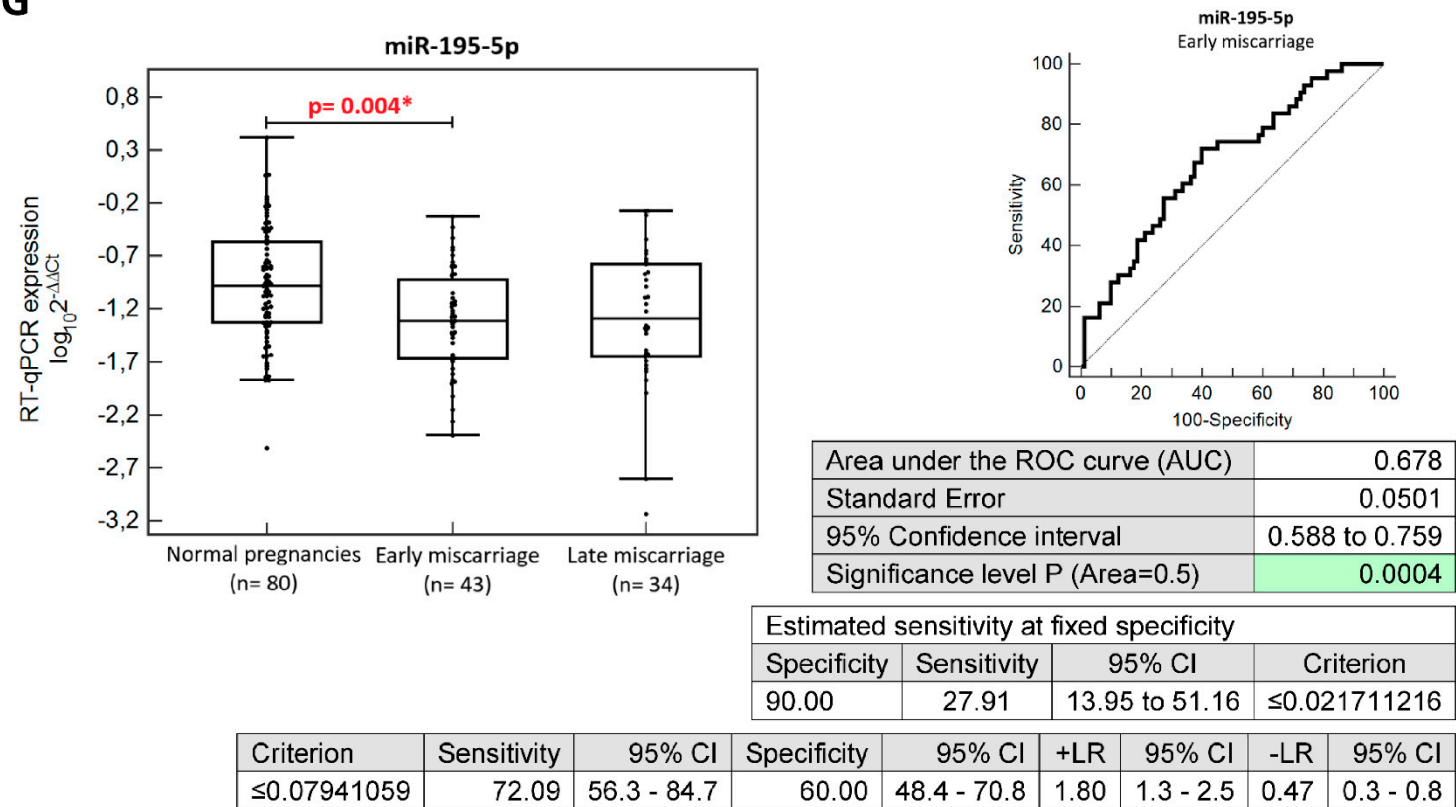

**Supplementary Figure S3.** Increased levels of miR-1-3p (A), miR-16-5p (B), miR-17-5p (C), miR-146a-5p (E), and miR-181a-5p (F), and decreased levels of miR-130b-3p (D) in early stages of gestation in pregnancies with an early miscarriage occurring before 13 gestational weeks and a late miscarriage occurring within 13 and 20 gestational weeks; decreased levels of miR-195-5p (G) in pregnancies with an early miscarriage only.  
(results after the Benjamini-Hochberg correction are marked by \* for  $\alpha=0.05$ , \*\* for  $\alpha=0.01$ , and \*\*\* for  $\alpha=0.001$ )
