# Supplementary material for: First-Trimester Screening for Miscarriage or Stillbirth—Prediction Model Based on MicroRNA Biomarkers
Source: MDPI journal article supplement (doi:10.3390/ijms241210137), 2023-06-14
Supplement: s1 [file s1]

Supplementary Figure S1.

**A**

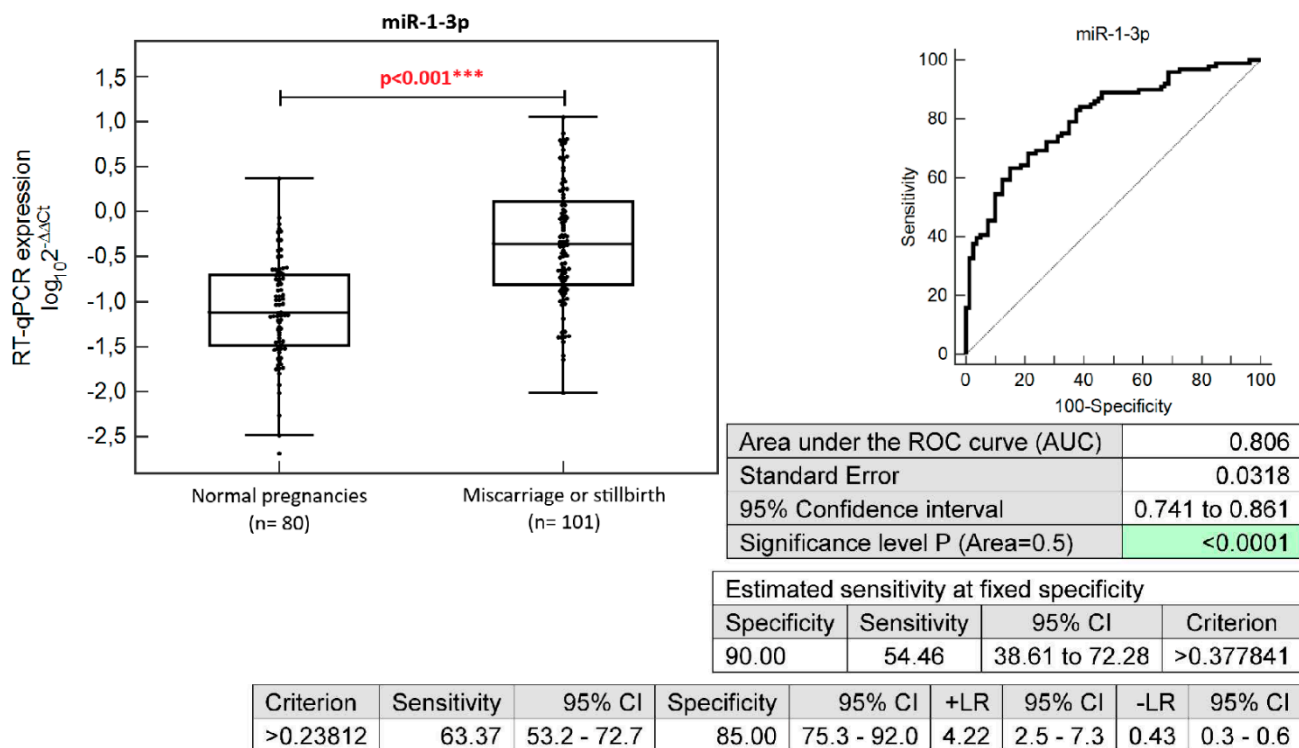

**B**

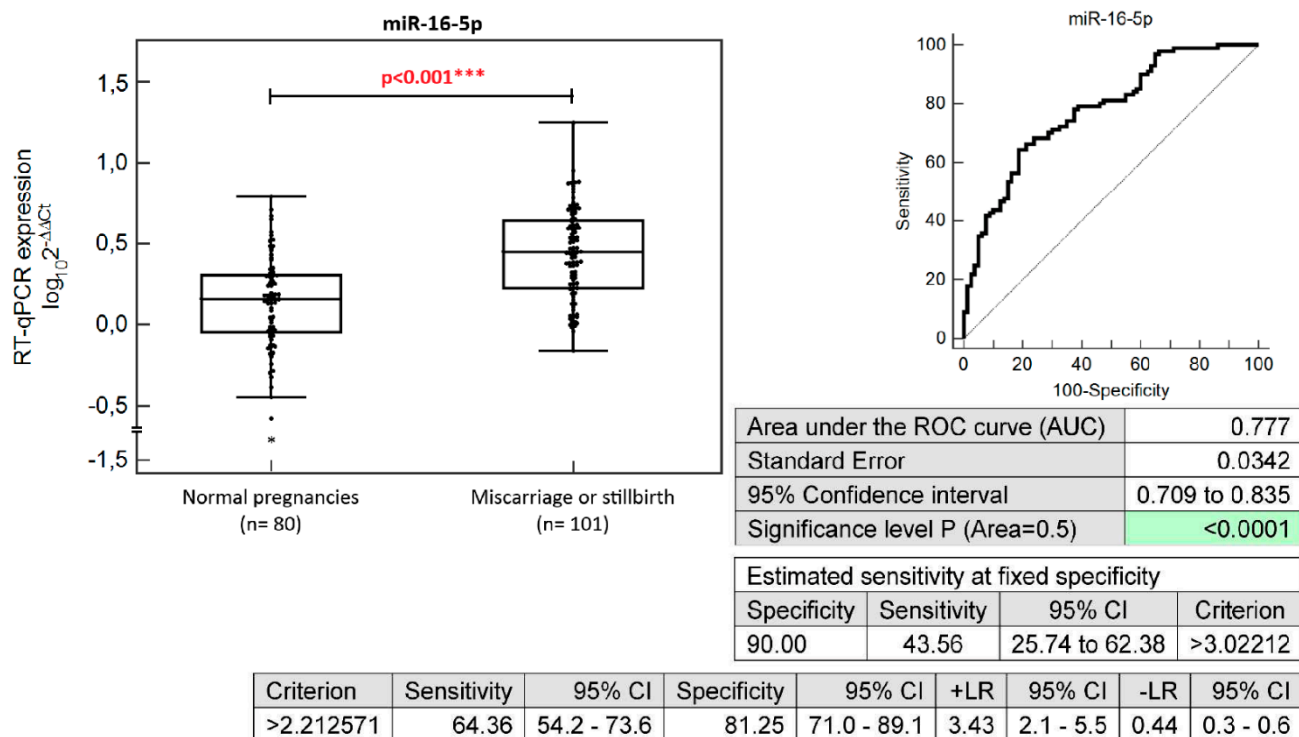

C

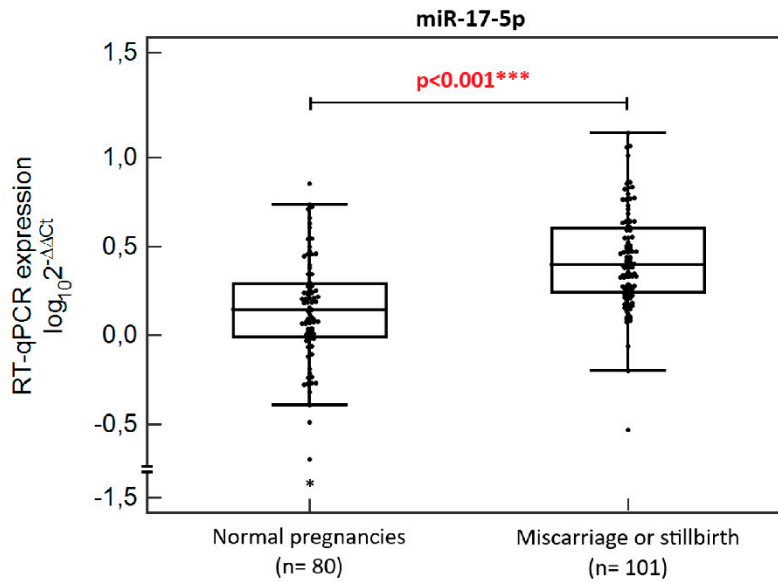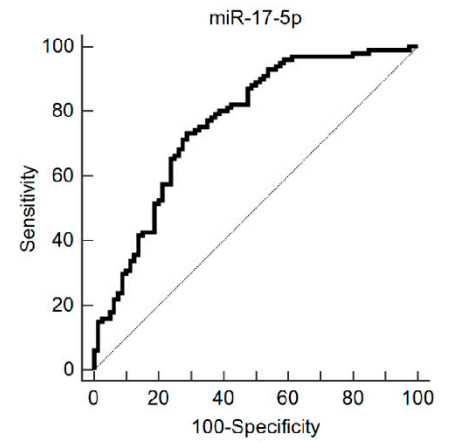

|                                 |                |
|---------------------------------|----------------|
| Area under the ROC curve (AUC)  | 0.766          |
| Standard Error                  | 0.0362         |
| 95% Confidence interval         | 0.698 to 0.826 |
| Significance level P (Area=0.5) | <0.0001        |

| Estimated sensitivity at fixed specificity |             |                |           |
|--------------------------------------------|-------------|----------------|-----------|
| Specificity                                | Sensitivity | 95% CI         | Criterion |
| 90.00                                      | 30.69       | 13.86 to 48.51 | >3.458809 |

| Criterion | Sensitivity | 95% CI      | Specificity | 95% CI      | +LR  | 95% CI    | -LR  | 95% CI    |
|-----------|-------------|-------------|-------------|-------------|------|-----------|------|-----------|
| >1.780378 | 73.27       | 63.5 - 81.6 | 71.25       | 60.0 - 80.8 | 2.55 | 1.8 - 3.7 | 0.38 | 0.3 - 0.5 |

D

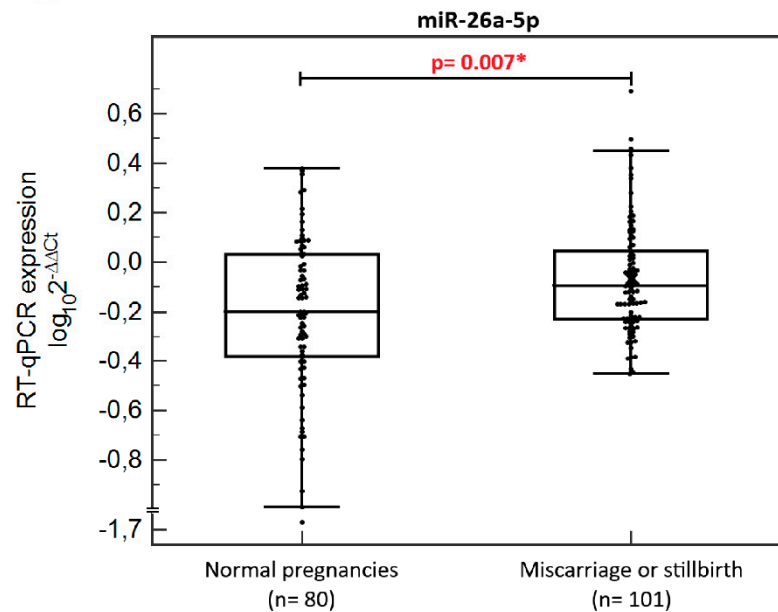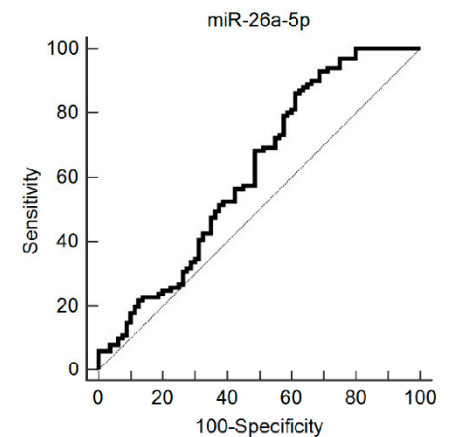

|                                 |                |
|---------------------------------|----------------|
| Area under the ROC curve (AUC)  | 0.617          |
| Standard Error                  | 0.0432         |
| 95% Confidence interval         | 0.542 to 0.688 |
| Significance level P (Area=0.5) | 0.0068         |

| Estimated sensitivity at fixed specificity |             |               |           |
|--------------------------------------------|-------------|---------------|-----------|
| Specificity                                | Sensitivity | 95% CI        | Criterion |
| 90.00                                      | 17.82       | 6.93 to 28.76 | >1.350228 |

| Criterion | Sensitivity | 95% CI      | Specificity | 95% CI      | +LR  | 95% CI    | -LR  | 95% CI    |
|-----------|-------------|-------------|-------------|-------------|------|-----------|------|-----------|
| >0.525138 | 86.14       | 77.8 - 92.2 | 38.75       | 28.1 - 50.3 | 1.41 | 1.2 - 1.7 | 0.36 | 0.2 - 0.6 |

**E**

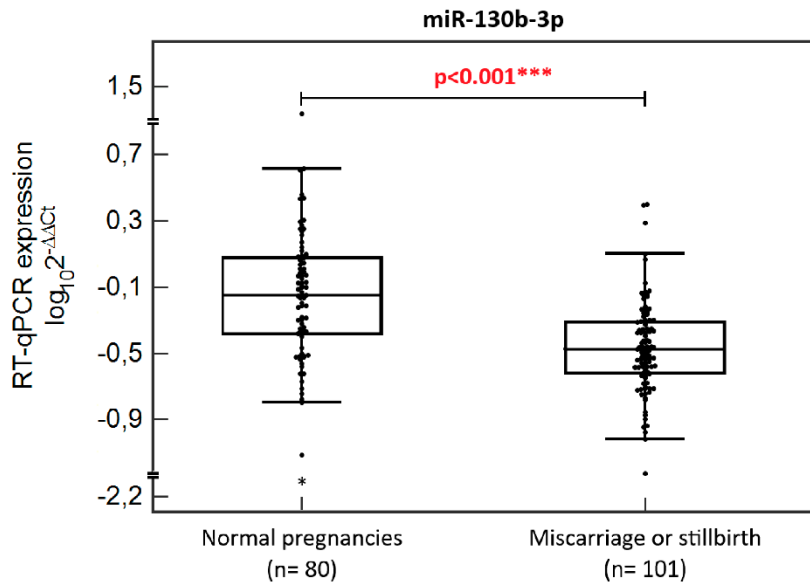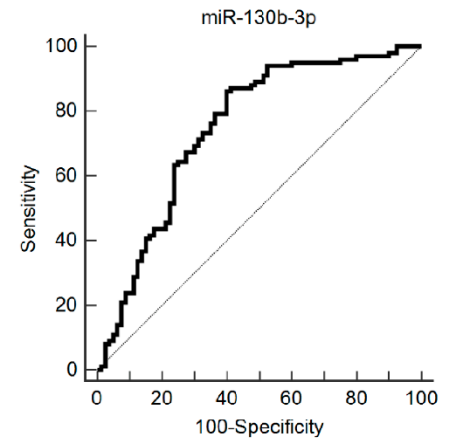

|                                 |                |
|---------------------------------|----------------|
| Area under the ROC curve (AUC)  | 0.749          |
| Standard Error                  | 0.0383         |
| 95% Confidence interval         | 0.679 to 0.810 |
| Significance level P (Area=0.5) | <0.0001        |

| Estimated sensitivity at fixed specificity |             |               |           |
|--------------------------------------------|-------------|---------------|-----------|
| Specificity                                | Sensitivity | 95% CI        | Criterion |
| 90.00                                      | 23.76       | 6.93 to 42.35 | ≤0.235772 |

| Criterion    | Sensitivity | 95% CI      | Specificity | 95% CI      | +LR  | 95% CI    | -LR  | 95% CI    |
|--------------|-------------|-------------|-------------|-------------|------|-----------|------|-----------|
| ≤0.591670738 | 86.14       | 77.8 - 92.2 | 60.00       | 48.4 - 70.8 | 2.15 | 1.6 - 2.8 | 0.23 | 0.1 - 0.4 |

**F**

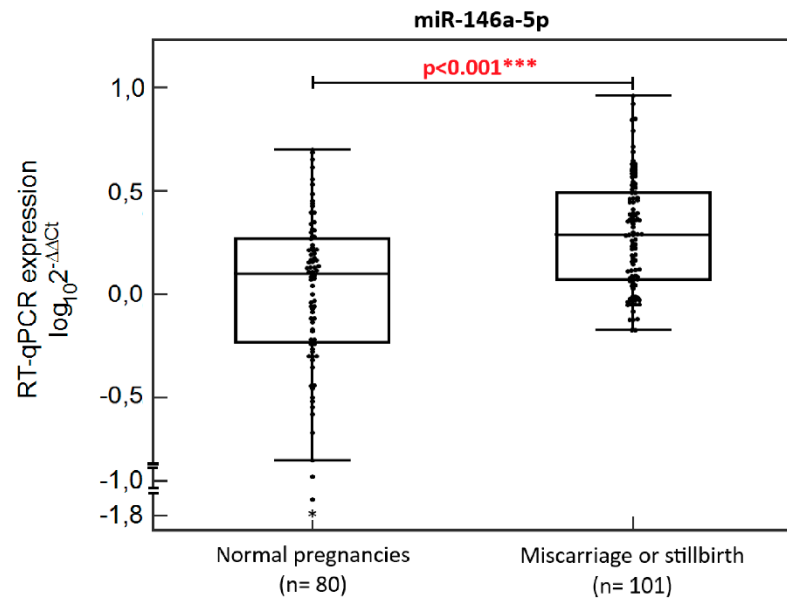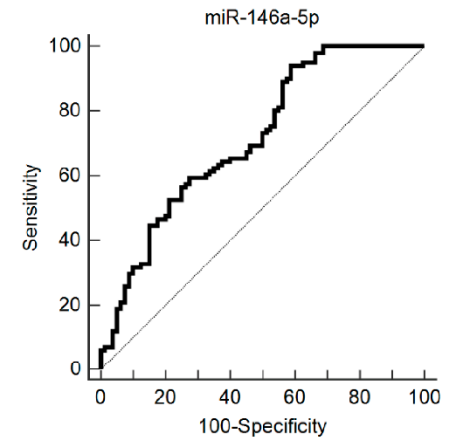

|                                 |                |
|---------------------------------|----------------|
| Area under the ROC curve (AUC)  | 0.717          |
| Standard Error                  | 0.0385         |
| 95% Confidence interval         | 0.645 to 0.781 |
| Significance level P (Area=0.5) | <0.0001        |

| Estimated sensitivity at fixed specificity |             |                |           |
|--------------------------------------------|-------------|----------------|-----------|
| Specificity                                | Sensitivity | 95% CI         | Criterion |
| 90.00                                      | 31.68       | 16.83 to 52.48 | >2.744534 |

| Criterion | Sensitivity | 95% CI      | Specificity | 95% CI      | +LR  | 95% CI    | -LR  | 95% CI     |
|-----------|-------------|-------------|-------------|-------------|------|-----------|------|------------|
| >0.879161 | 94.06       | 87.5 - 97.8 | 41.25       | 30.4 - 52.8 | 1.60 | 1.3 - 1.9 | 0.14 | 0.06 - 0.3 |

G

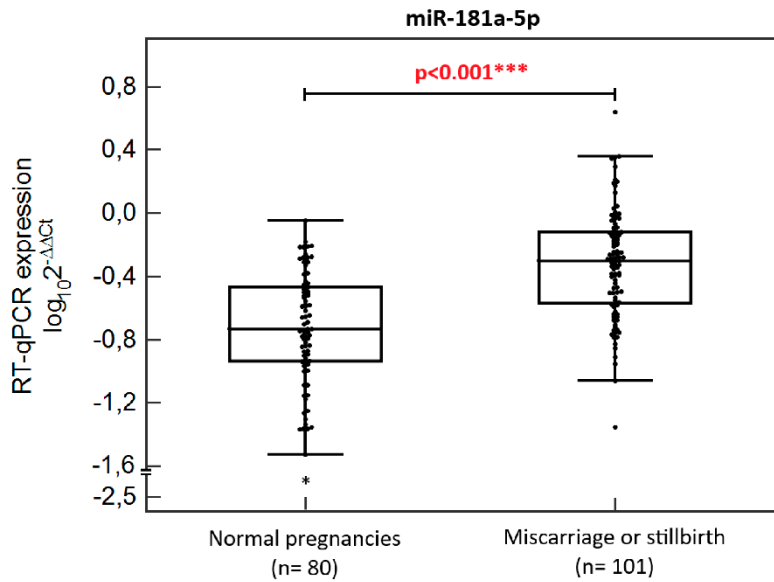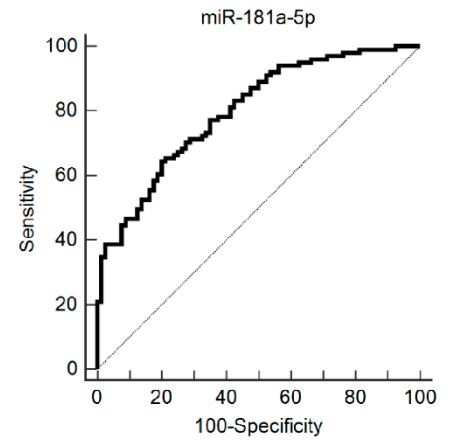

|                                 |                |
|---------------------------------|----------------|
| Area under the ROC curve (AUC)  | 0.799          |
| Standard Error                  | 0.0321         |
| 95% Confidence interval         | 0.734 to 0.855 |
| Significance level P (Area=0.5) | <0.0001        |

| Estimated sensitivity at fixed specificity |             |                |           |
|--------------------------------------------|-------------|----------------|-----------|
| Specificity                                | Sensitivity | 95% CI         | Criterion |
| 90.00                                      | 46.53       | 32.67 to 61.52 | >0.521629 |

| Criterion | Sensitivity | 95% CI      | Specificity | 95% CI      | +LR  | 95% CI    | -LR  | 95% CI    |
|-----------|-------------|-------------|-------------|-------------|------|-----------|------|-----------|
| >0.368016 | 64.36       | 54.2 - 73.6 | 80.00       | 69.6 - 88.1 | 3.22 | 2.0 - 5.1 | 0.45 | 0.3 - 0.6 |

H

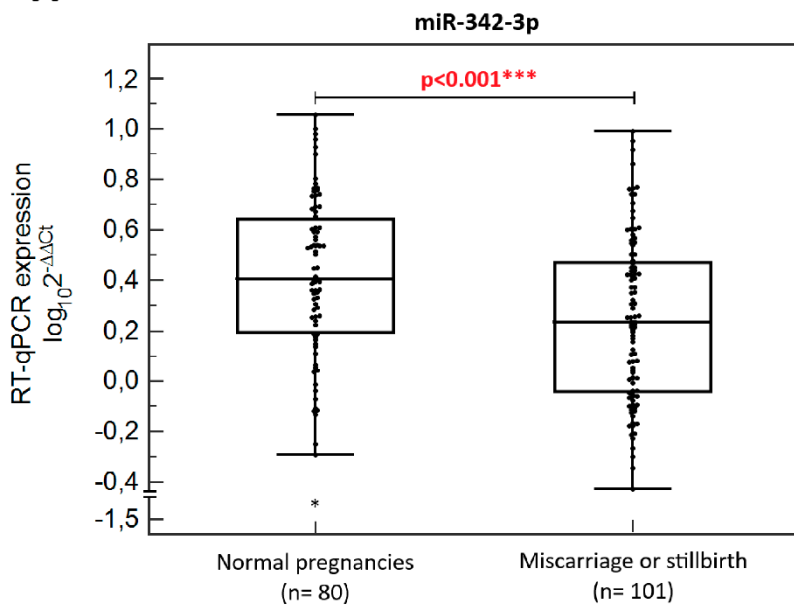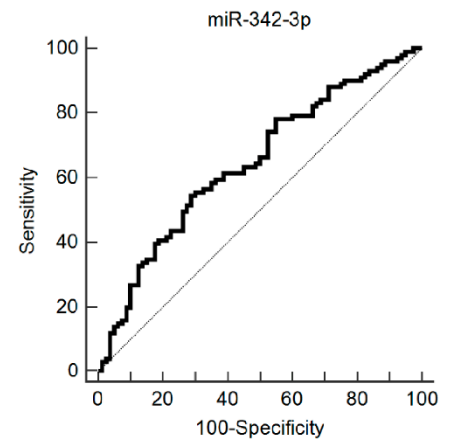

|                                 |                |
|---------------------------------|----------------|
| Area under the ROC curve (AUC)  | 0.645          |
| Standard Error                  | 0.0412         |
| 95% Confidence interval         | 0.571 to 0.715 |
| Significance level P (Area=0.5) | 0.0004         |

| Estimated sensitivity at fixed specificity |             |                |              |
|--------------------------------------------|-------------|----------------|--------------|
| Specificity                                | Sensitivity | 95% CI         | Criterion    |
| 90.00                                      | 26.73       | 11.84 to 45.54 | ≤0.909153316 |

| Criterion    | Sensitivity | 95% CI      | Specificity | 95% CI      | +LR  | 95% CI    | -LR  | 95% CI    |
|--------------|-------------|-------------|-------------|-------------|------|-----------|------|-----------|
| ≤1.797163562 | 54.46       | 44.2 - 64.4 | 71.25       | 60.0 - 80.8 | 1.89 | 1.3 - 2.8 | 0.64 | 0.5 - 0.8 |

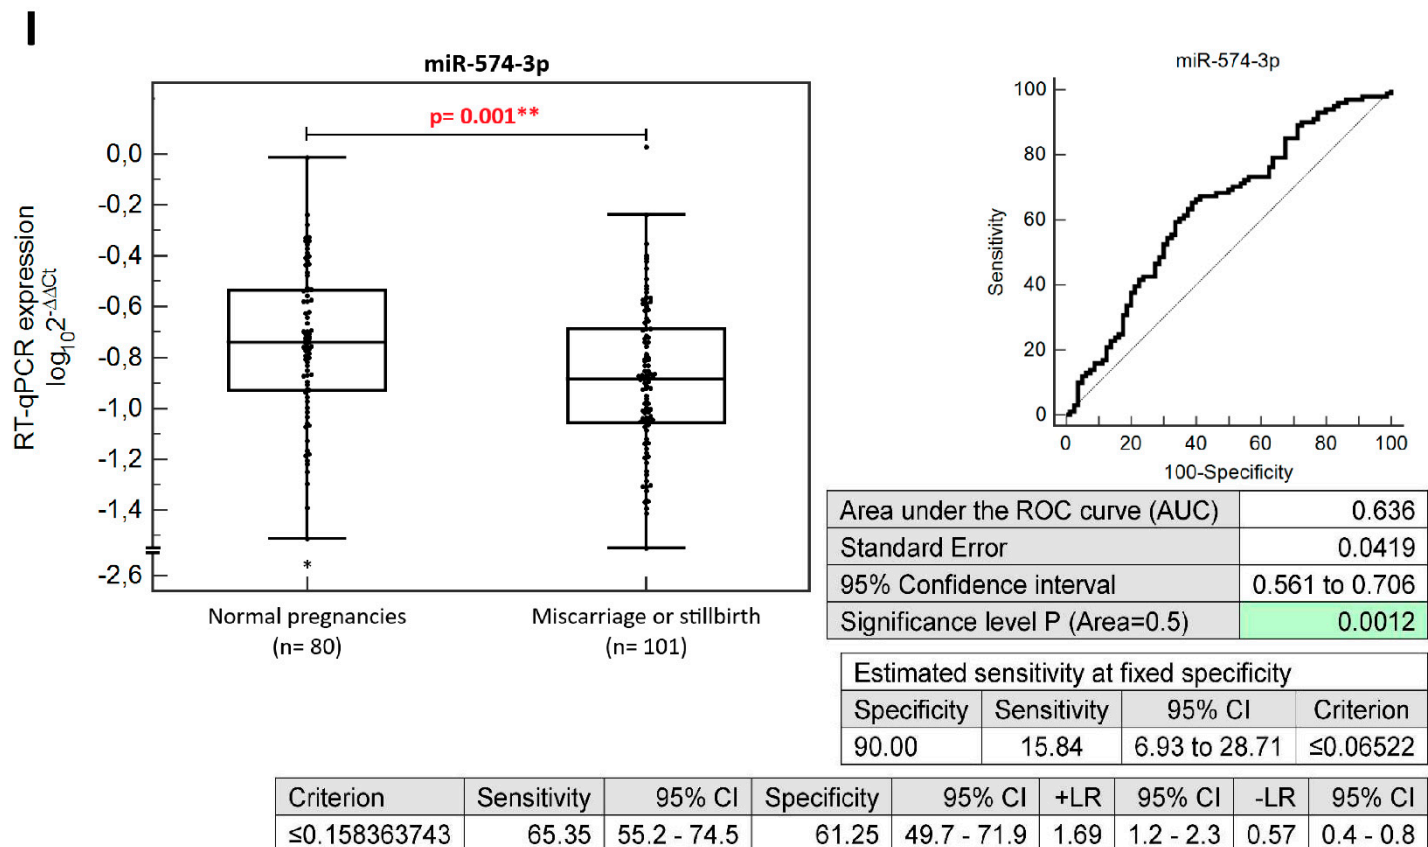

**Supplementary Figure S1.** Up-regulation of miR-1-3p (A), miR-16-5p (B), miR-17-5p (C), miR-26a-5p (D), miR-146a-5p (F), and miR-181a-5p (G) and down-regulation of miR-130b-3p (E), miR-342-3p (H), and miR-574-3p (I) differentiates in early stages of gestation between normal term pregnancies and pregnancies with subsequent miscarriage or stillbirth.

(results after the Benjamini-Hochberg correction are marked by \* for  $\alpha=0.05$ , \*\* for  $\alpha=0.01$ , and \*\*\* for  $\alpha=0.001$ )
